# Supplementary material for: Thiophenecarboxamide Derivatives Activated by EthA Kill Mycobacterium tuberculosis by Inhibiting the CTP Synthetase PyrG
Source: PubMed Central journal article supplement (PMC4521081; doi:10.1016/j.chembiol.2015.05.016), 2015-07-23
Supplement: mmc3.pdf [file mmc3.pdf]

# Chemistry & Biology

## Thiophenecarboxamide Derivatives Activated by EthA Kill *Mycobacterium tuberculosis* by Inhibiting the CTP Synthetase PyrG

### Graphical Abstract

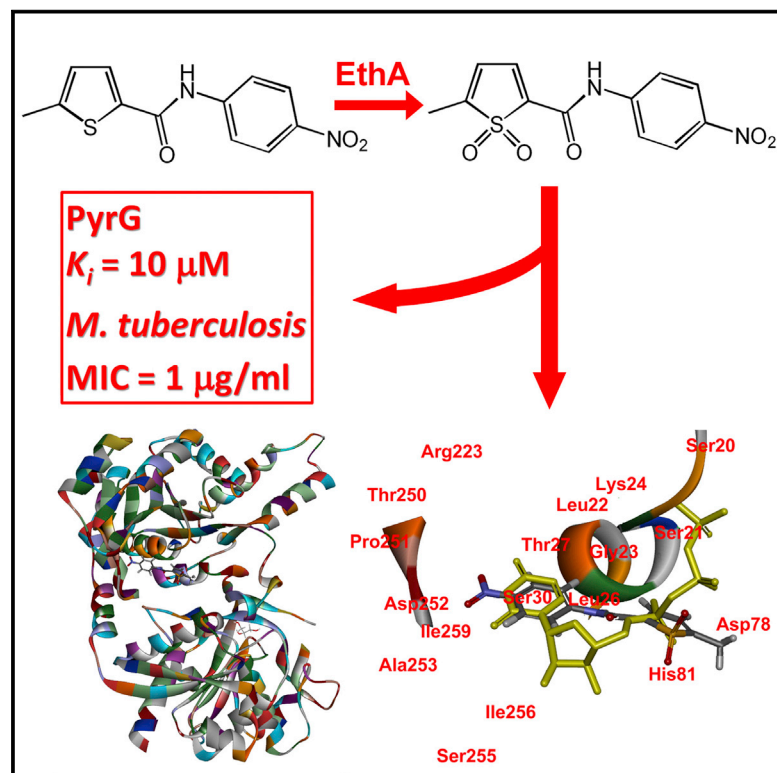

### Authors

Giorgia Mori, Laurent R. Chiarelli, Marta Esposito, ..., Giovanna Riccardi, Stewart T. Cole, Maria Rosalia Pasca

### Correspondence

mariarosalia.pasca@unipv.it (M.R.P.), stewart.cole@epfl.ch (S.T.C.)

### In Brief

CTP synthetase PyrG, essential in *Mycobacterium tuberculosis*, could represent a new potential drug target. With a multidisciplinary approach, Mori et al. identify two compounds killing growing and dormant mycobacteria through PyrG inhibition, and define their mechanism of action.

### Highlights

- Two compounds activated by EthA kill *M. tuberculosis* through PyrG inhibition
- EthA metabolite is active against PyrG and *M. tuberculosis* growth
- Definition of the mechanism of activation and validation of PyrG as a new drug target

### Accession Numbers

4ZDI  
4ZDJ  
4ZDK

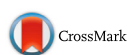

# Thiophenecarboxamide Derivatives Activated by EthA Kill *Mycobacterium tuberculosis* by Inhibiting the CTP Synthetase PyrG

Giorgia Mori,<sup>1,14</sup> Laurent R. Chiarelli,<sup>1,14</sup> Marta Esposito,<sup>1,14</sup> Vadim Makarov,<sup>2,14</sup> Marco Bellinzoni,<sup>3</sup> Ruben C. Hartkoorn,<sup>4</sup> Giulia Degiacomi,<sup>5</sup> Francesca Boldrin,<sup>5</sup> Sean Ekins,<sup>6</sup> Ana Luisa de Jesus Lopes Ribeiro,<sup>1,15</sup> Leonardo B. Marino,<sup>7,8</sup> Ivana Centárová,<sup>9</sup> Zuzana Svetlíková,<sup>9</sup> Jaroslav Blaško,<sup>10</sup> Elena Kazakova,<sup>2</sup> Alexander Lepioshkin,<sup>2</sup> Nathalie Barilone,<sup>3,16</sup> Giuseppe Zaroni,<sup>11</sup> Alessio Porta,<sup>11</sup> Marco Fondi,<sup>12</sup> Renato Fani,<sup>12</sup> Alain R. Baulard,<sup>13</sup> Katarína Mikušová,<sup>9</sup> Pedro M. Alzari,<sup>3</sup> Riccardo Manganelli,<sup>5</sup> Luiz Pedro S. de Carvalho,<sup>7</sup> Giovanna Riccardi,<sup>1</sup> Stewart T. Cole,<sup>4,\*</sup> and Maria Rosalia Pasca<sup>1,\*</sup>

<sup>1</sup>Department of Biology and Biotechnology “Lazzaro Spallanzani”, University of Pavia, 27100 Pavia, Italy

<sup>2</sup>A. N. Bakh Institute of Biochemistry, Russian Academy of Science, 119071 Moscow, Russia

<sup>3</sup>Institut Pasteur, Unité de Microbiologie Structurale, CNRS-UMR3528, Université Paris Diderot, Sorbonne Paris Cité, 25 rue du Dr. Roux, 75724 Paris Cedex 15, France

<sup>4</sup>Global Health Institute, Ecole Polytechnique Fédérale de Lausanne, Station 19, 1015 Lausanne, Switzerland

<sup>5</sup>Department of Molecular Medicine, University of Padova, 35128 Padua, Italy

<sup>6</sup>Collaborative Drug Discovery, 1633 Bayshore Highway, Suite 342, Burlingame, CA 94010, USA

<sup>7</sup>Francis Crick Institute, Mill Hill Laboratory, The Ridgeway, Mill Hill, London NW7 1AA, UK

<sup>8</sup>Faculty of Pharmaceutical Sciences, UNESP - Univ Estadual Paulista, Araraquara, São Paulo 14801-902, Brazil

<sup>9</sup>Department of Biochemistry, Faculty of Natural Sciences, Comenius University in Bratislava, Ilkovičova 6, Mlynská dolina, 84215 Bratislava, Slovakia

<sup>10</sup>Institute of Chemistry, Faculty of Natural Sciences, Comenius University in Bratislava, Ilkovičova 6, Mlynská dolina, 84215 Bratislava, Slovak Republic

<sup>11</sup>Department of Chemistry, University of Pavia, 27100 Pavia, Italy

<sup>12</sup>Department of Biology, University of Florence, Sesto Fiorentino, Florence 50019, Italy

<sup>13</sup>Institut Pasteur de Lille, Center for Infection and Immunity, 59019 Lille, France

<sup>14</sup>Co-first author

<sup>15</sup>Present address: Centro de Biología Molecular “Severo Ochoa” Universidad Autónoma de Madrid, 28049, Madrid, Spain

<sup>16</sup>Present address: Institut Pasteur, Unité de Neuro-Immunologie Virale, 25 rue du Dr. Roux, 75724 Paris Cedex 15, France

\*Correspondence: [mariarosalia.pasca@unipv.it](mailto:mariarosalia.pasca@unipv.it) (M.R.P.), [stewart.cole@epfl.ch](mailto:stewart.cole@epfl.ch) (S.T.C.)

<http://dx.doi.org/10.1016/j.chembiol.2015.05.016>

This is an open access article under the CC BY license (<http://creativecommons.org/licenses/by/4.0/>).

## SUMMARY

To combat the emergence of drug-resistant strains of *Mycobacterium tuberculosis*, new antitubercular agents and novel drug targets are needed. Phenotypic screening of a library of 594 hit compounds uncovered two leads that were active against *M. tuberculosis* in its replicating, non-replicating, and intracellular states: compounds 7947882 (5-methyl-*N*-(4-nitrophenyl)thiophene-2-carboxamide) and 7904688 (3-phenyl-*N*-[(4-piperidin-1-yl)phenyl]carbamothioyl]propanamide). Mutants resistant to both compounds harbored mutations in *ethA* (*rv3854c*), the gene encoding the monooxygenase EthA, and/or in *pyrG* (*rv1699*) coding for the CTP synthetase, PyrG. Biochemical investigations demonstrated that EthA is responsible for the activation of the compounds, and by mass spectrometry we identified the active metabolite of 7947882, which directly inhibits PyrG activity. Metabolomic studies revealed that pharmacological inhibition of PyrG strongly perturbs DNA and RNA biosynthesis, and other metabolic processes

requiring nucleotides. Finally, the crystal structure of PyrG was solved, paving the way for rational drug design with this newly validated drug target.

## INTRODUCTION

Tuberculosis (TB) remains a leading cause of infectious mortality worldwide, killing approximately 1.5 million people each year. Drug-resistant strains of *Mycobacterium tuberculosis* threaten global TB management, with an estimated 450,000 cases being multidrug resistant, defined as resistant to rifampin and isoniazid. A subset of these cases, approximately 10%, is also resistant to the second-line drug classes, fluoroquinolones, and injectable aminoglycosides, and is referred to as extensively drug resistant (WHO, 2014).

Defining the pharmacological target(s) of antitubercular drugs under development and finding new compounds with greater potency are both important aspects in the search for agents that are effective against drug-sensitive and drug-resistant *M. tuberculosis* strains (Lechartier et al., 2014). Several current antimycobacterial agents are prodrugs requiring some form of cellular activation before they can bind to their specific targets

**Table 1. Activity In Vitro in Latent and Replicating *M. tuberculosis* Growth and Activity Ex Vivo of the Two Selected Compounds**

| Compound ID | Structure                                                                         | H37Rv MIC ( $\mu\text{g/ml}$ ) | ss18b IC <sub>50</sub> /IC <sub>90</sub> ( $\mu\text{g/ml}$ ) | Intracellular IC <sub>50</sub> /IC <sub>90</sub> ( $\mu\text{g/ml}$ ) |
|-------------|-----------------------------------------------------------------------------------|--------------------------------|---------------------------------------------------------------|-----------------------------------------------------------------------|
| 7904688     | 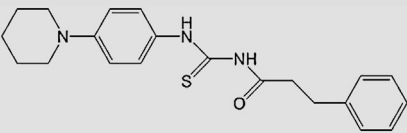 | 0.5                            | 2.5/20                                                        | 0.175/0.625                                                           |
| 7947882     |  | 0.5                            | 2.5/10                                                        | 0.625/1.25                                                            |

and, in such cases, resistance can be mediated by mutations that prevent the activation step. Therefore, understanding the mode of activation not only helps to decipher the mechanisms of drug resistance, but may also facilitate the development of analogs that do not require activation (Dover et al., 2007).

In this work, by screening a library of compounds with known antitubercular activity, established by the National Institute of Allergy and Infectious Diseases (NIAID) (Ananthan et al., 2009; Goldman and Laughon, 2009; Maddry et al., 2009), a new series of molecules was found, displaying a very low minimum inhibitory concentration (MIC) value (0.5  $\mu\text{g/ml}$ ), that includes compounds 7947882 and 7904688. Through the isolation of *M. tuberculosis*-resistant mutants, genetic validation, and biochemical and structural studies, the main mechanisms of activation and resistance of these new antitubercular compounds have been characterized. The combined data indicate that 7947882 and 7904688 are prodrugs activated by the EthA monooxygenase, which then target PyrG, a cytidine triphosphate (CTP) synthetase catalyzing the ATP-dependent amination of uridine triphosphate (UTP) to form the essential pyrimidine nucleotide CTP (Long and Pardee, 1967). CTP synthetase is thus a tractable new TB drug target.

## RESULTS AND DISCUSSION

### Screening of NIAID Library

A library of 594 compounds, selected by high-throughput screening (HTS) against *M. tuberculosis* H37Rv (Ananthan et al., 2009; Goldman and Laughon, 2009; Maddry et al., 2009), was tested for activity against non-replicating *M. tuberculosis* using the streptomycin-starved 18b (ss18b) model (Sala et al., 2010; Zhang et al., 2012). Two promising compounds were identified: a 5-methyl-*N*-(4-nitrophenyl)thiophene-2-carboxamide (7947882) and a 3-phenyl-*N*-[(4-piperidin-1-ylphenyl)carbamothioyl]propanamide (7904688). Both compounds also showed activity against replicating and intracellular *M. tuberculosis* H37Rv (Table 1). Moreover, the molecules were not cytotoxic to HepG2, A549, Raw, and Huh7 cell lines at concentrations below 40  $\mu\text{g/ml}$ . Compounds were re-purchased from Chembridge Chemical Store (<http://www.hit2lead.com/>) and the results were confirmed.

### Isolation and Characterization of *M. tuberculosis*-Resistant Mutants

To characterize the mechanism of action of 7947882 and 7904688, several spontaneous *M. tuberculosis* mutants resistant

to the compounds were isolated. The spontaneous mutants exhibited the same resistance levels to both drugs (10  $\mu\text{g/ml}$ , 20 $\times$  MIC) (Table 2). Illumina whole-genome sequencing of all mutants revealed mutations either in *ethA* (*rv3854c*), encoding a monooxygenase responsible for ethionamide (ETH) activation (Baulard et al., 2000), and/or *pyrG* (*rv1699*), encoding the CTP synthetase, which performs the ATP-dependent amination of UTP to form CTP as the final step of the pyrimidine nucleotide biosynthetic pathway (Endrizzi et al., 2004) (Table 2). Notably, *M. tuberculosis* mutants resistant to compound 7947882 carried different point mutations in *ethA*, resulting in either an amino acid substitution or a truncated protein. In addition, these mutants all harbored the same mutation in the *pyrG* gene: T557G (Val186Gly). By contrast, no mutations in *ethA* were found in *M. tuberculosis* mutants resistant to compound 7904688, but these all carried the Val186Gly substitution in PyrG (Table 2).

Since *pyrG*, unlike *ethA*, is predicted to be an essential gene in *M. tuberculosis* (Sassetti et al., 2001), it was hypothesized that EthA could be required to activate 7947882 and 7904688 compounds, while the target of the activated metabolites might be PyrG. The finding that all strains harboring a mutation in *ethA* showed cross-resistance to ETH, whereas strains mutated only in *pyrG* remained ETH sensitive, reinforced this hypothesis (Table 2).

### EthA Is an Activator of 7947882 and 7904688 Compounds

To verify whether EthA is responsible for the activation of 7947882 and 7904688, the *ethA* gene was cloned in the expression vector pSODIT-2, and *M. tuberculosis* H37Rv cells were transformed with the corresponding recombinant plasmid. A statistically significant shift in the MIC of the transformants was observed with respect to the control; overexpression of *ethA* in *M. tuberculosis* H37Rv increased the sensitivity to 7947882 and 7904688 (Table S1). Moreover, the overexpression of wild-type *ethA* restored the sensitivity to 7947882 in *M. tuberculosis* 82.14 mutant cells, carrying a mutation in *ethA* (Table S1).

To prove that both compounds were activated by EthA, a recombinant form of the *M. tuberculosis* enzyme was expressed in *Escherichia coli* and purified, and its activity toward the two compounds as substrates was assayed. EthA was active toward both 7947882 and 7904688, with  $k_{\text{cat}}$  values of  $2.9 \pm 0.08$  and  $2.4 \pm 0.15 \text{ min}^{-1}$  and  $K_m$  values of  $0.037 \pm 0.002$  and  $0.055 \pm 0.004 \text{ mM}$  for 7947882 and 7904688, respectively. Moreover, both compounds were better substrates for EthA than ETH,

**Table 2. Main Features of *M. tuberculosis* Mutants Resistant to 7947882 and 7904688**

| <i>M. tuberculosis</i><br>Strains | MIC ( $\mu\text{g/ml}$ ) |         |     | WGS Sequencing<br>Results (Amino<br>Acid Change) |                  |
|-----------------------------------|--------------------------|---------|-----|--------------------------------------------------|------------------|
|                                   | 7947882                  | 7904688 | ETH | <i>ethA</i>                                      | <i>pyrG</i>      |
| H37Rv                             | 0.5                      | 0.5     | 1   | –                                                | –                |
| 82.14                             | >40                      | >40     | 10  | T133C<br>(W45R)                                  | T557G<br>(V186G) |
| 82.19                             | >40                      | >40     | 10  | T386C<br>(L129P)                                 | T557G<br>(V186G) |
| 82.22                             | >40                      | >40     | 10  | $\Delta$ T-94                                    | T557G<br>(V186G) |
| 88.7                              | 5–10                     | 10      | 0.5 | –                                                | T557G<br>(V186G) |
| 88.10                             | 5–10                     | 10      | 0.5 | –                                                | T557G<br>(V186G) |
| 81.10 <sup>a</sup>                | >40                      | >40     | 10  | $\Delta$ 1109–<br>1137                           | –                |

See Table S1.

<sup>a</sup>Laboratory collection.

showing  $\sim$ 10-fold higher affinity ( $K_m$  for ETH 0.34 mM), similar to that for phenylacetone, the best EthA substrate found so far ( $K_m$  0.06 mM and  $k_{\text{cat}}$  0.027 s<sup>-1</sup>) (Fraaije et al., 2004). The body of genetic and biochemical data strongly suggests that these two compounds are prodrugs that need EthA activation.

### 7947882 and 7904688 Do Not Affect PyrG Enzyme Activity but Require EthA Activation

To check whether compounds 7947882 and 7904688 were able to inhibit PyrG, their effect on the enzyme activity was evaluated. For this purpose, wild-type PyrG and the V186G mutant protein were produced in *E. coli*, purified, and characterized. *M. tuberculosis* PyrG shows catalytic constants ( $k_{\text{cat}}$  21.9  $\pm$  0.5 s<sup>-1</sup> and  $K_m$  0.18  $\pm$  0.01 mM toward ATP;  $k_{\text{cat}}$  22.9  $\pm$  0.9 s<sup>-1</sup> and  $K_m$  0.14  $\pm$  0.01 mM toward UTP) very similar to those of other bacterial CTP synthetases (Anderson, 1983; Long and Pardee, 1967; Willemoës et al., 2005). The PyrG mutant V186G was still active, but partially impaired, displaying reduced  $k_{\text{cat}}$  values toward both substrates (1.5  $\pm$  0.11 and 1.6  $\pm$  0.08 s<sup>-1</sup> for ATP and UTP, respectively). Moreover, the mutant enzyme showed a  $K_m$  value for ATP that was about 10-fold higher than that of the wild-type protein (1.46  $\pm$  0.18 mM), whereas the affinity for UTP was unchanged.

Since this mutation is associated with resistance to 7947882 and 7904688 (Table 2), it was conceivable that the ATP-binding site was involved in binding the inhibitors. For this reason, the effects of the two compounds were tested on wild-type PyrG at a final concentration of 200  $\mu\text{M}$ . As expected for molecules that need to be activated by EthA, the compounds were ineffective toward PyrG in all the conditions tested.

Thus, to confirm that EthA produces metabolites that might act on PyrG, the EthA enzymatic reaction was performed with either 7947882 or 7904688 in the presence of PyrG, and the activity of the latter enzyme was monitored during the course of the reaction. The blank control was performed omitting reduced

nicotinamide adenine dinucleotide phosphate (NADPH) to hinder the EthA-catalyzed reaction, and under these conditions PyrG maintained full activity for up to 6 hr of incubation. By contrast, in the presence of an actively working EthA, PyrG lost full activity within 4 hr when incubated with 7947882, and about 80% of its activity in 6 hr when incubated with 7904688 (Figures 1A and 1C).

At the end of incubation, to remove EthA as well as any unbound compounds, PyrG was re-purified by Ni-NTA (nitrilotriacetic acid) chromatography and dialyzed. Whereas PyrG from the blank reaction preserved its activity, the enzyme incubated in the full reaction remained completely inactive. Moreover, in the UV-Vis spectrum of PyrG incubated with EthA and 7947882, an additional peak appeared at 330 nm (Figure 1B). This peak, which was not present in the PyrG spectrum from blank reactions without NADPH, is characteristic of 7947882, thus demonstrating that, in contrast to its prodrug, the EthA-activated metabolite is able to bind PyrG. Similarly, the spectrum of PyrG incubated with 7904688 showed the broad peak between 310 and 400 nm, typical of the compound; this peak was absent in the blank control (Figure 1D). These results demonstrated that the conversion of 7947882 and 7904688 by EthA leads to active inhibitors of PyrG.

### Identification of Active Metabolites of 7947882

EthA is known to catalyze the oxygenation of the thioamide moiety of ETH, leading to the formation of S-oxide and S-dioxide products (Vannelli et al., 2002), as well as the oxygenation of the sulfide group of methyl(*p*-tolyl)sulfide (Fraaije et al., 2004). Thus, it is conceivable that EthA might catalyze a similar reaction on the thiophene moiety of 7947882. To confirm this hypothesis, we attempted to identify the active metabolite(s) of the 7947882 prodrug after purification from the EthA reaction mixture.

Two main products (M1 and M2) were isolated and subjected to mass spectrometry analysis. The two isolated compounds showed *m/z* values of 293 and 277, respectively, which are in agreement with the S-dioxide and the S-monoxide derivatives of the 7947882 compound. Moreover, the fragmentation spectra of the metabolites showed a pattern similar to that of 7947882, in accordance with mono- and di-oxygenation of the thiophene sulfur atom of the substrate (Figures 1E and 1F). The partially purified metabolites were tested against PyrG protein and found to inhibit its enzymatic activity. Notably, the M1 product showed a higher degree of inhibition.

To better characterize the 7947882 metabolites, its S-dioxide derivative was chemically synthesized, giving rise to compound 11426026. The mass spectrum of 11426026 showed the same pattern as the M1 compound, confirming that M1 corresponds to the 7947882 S-dioxide derivative (Figures 1E and 1F). Therefore, the effects of 11426026 toward *M. tuberculosis* growth and toward PyrG activity were assessed. The MIC of 11426026 for *M. tuberculosis* H37Rv, *ethA*, and *pyrG* mutant strains was determined (Table S2). Wild-type *M. tuberculosis* and the *ethA* mutant were similarly sensitive to 11426026 (with MICs close to that of the parent compound 7947882), showing that 11426026 does not require activation by EthA, whereas the *pyrG* mutant strain was resistant, thus demonstrating that PyrG could be the target of this active metabolite.

Indeed, this was confirmed when the inhibitory activity of 11426026 for PyrG was assessed, since the compound was

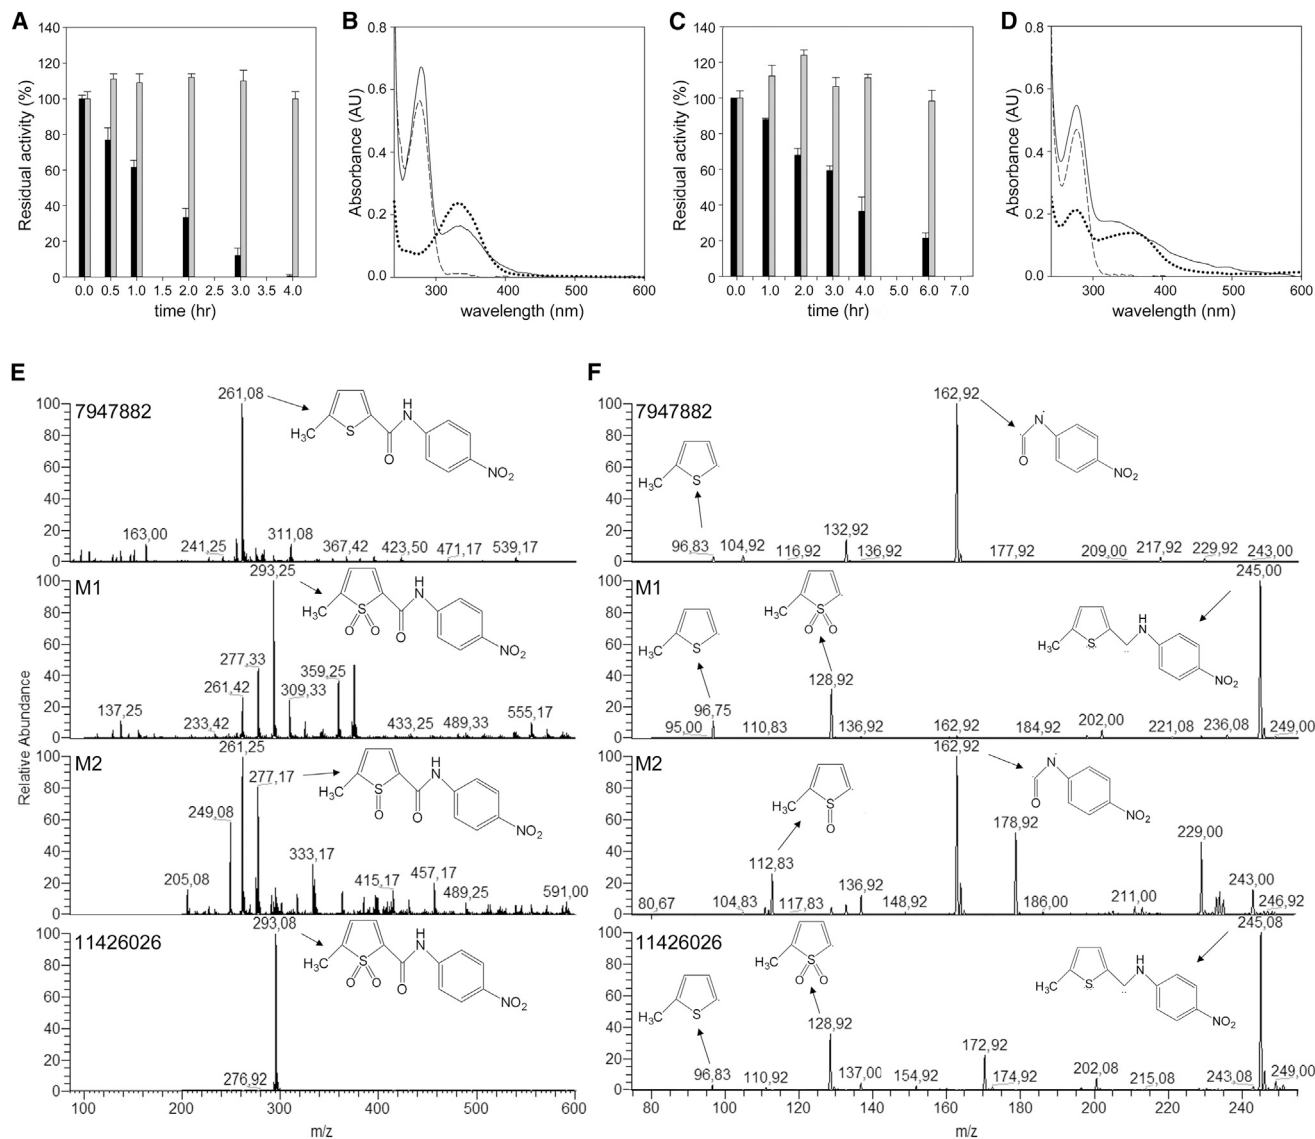

**Figure 1. EthA Converts the 7947882 and 7904688 Compounds into Active PyrG Inhibitors**

(A) Inhibition of PyrG activity during the co-incubation with EthA and 7947882. Gray bars correspond to the activities of the blank controls in the absence of NADPH, and black bars represent the residual activities after incubation with working EthA.

(B) UV-Vis spectra of the re-purified PyrG after co-incubation with EthA reaction with 7947882 compound. Solid line is the spectrum of PyrG incubated with full EthA reaction; dashed line is the spectrum of PyrG from blank reaction; dotted line is the spectrum of the compound at 20  $\mu$ M.

(C and D) Co-incubation of PyrG with EthA and 7904688 compound. Conditions are the same as for (A) and (B), respectively.

(E and F) Identification of in vitro EthA metabolites of 7947882 compound. Mass spectrometry analysis (from top to bottom) of the 7947882 compound, the partially purified products of EthA reaction M1 and M2, and the synthetic metabolite 11426026. (E) Full electrospray ionization mass spectrometry of the compounds recorded in negative mode. (F) Fragmentation pattern of the compounds.

See also [Figures S1](#) and [S2](#); [Table S2](#).

effective against the wild-type enzyme. Interestingly, the inhibitory effects were only found at subsaturating concentrations of ATP ( $IC_{50}$   $0.035 \pm 0.002$  mM in the presence of 0.2 mM ATP). Moreover, the compound was not active against the PyrG V186G mutant when tested under the same conditions. In fact, the estimated  $IC_{50}$  value was 44-fold higher than against the wild-type enzyme ( $1.5 \pm 0.15$  mM), at an ATP concentration of 1.5 mM, which corresponds to the  $K_m$  of the mutant for this substrate ([Figure S1A](#)).

This evidence confirms the hypothesis that 11426026 affects or binds at the ATP-binding site of PyrG, behaving as a competitive inhibitor with respect to ATP ( $K_i$   $0.010 \pm 0.002$  mM; [Figures S1B](#) and [S1C](#)). The high  $K_m$  value of the PyrG V186G mutant for ATP probably reflects the structural changes resulting from the mutation, which distorts the ATP-binding site and leading to an even lower affinity for the 11426026 derivative, thus explaining the resistance to this compound.

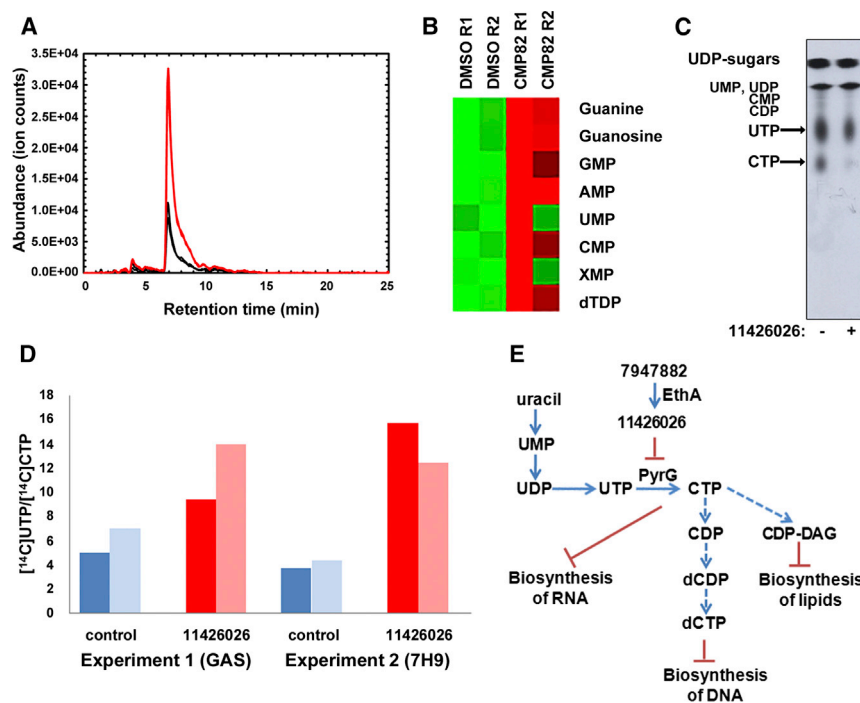

**Figure 2. PyrG Inhibition Affects Nucleotide Metabolism in *M. tuberculosis***

(A) Representative EIC for the AMP ion ( $(M + H)^+$ ,  $m/z = 348.07036$ ) illustrating its increased pool size in 7947882-treated *M. tuberculosis* (red lines) compared with control (black lines).

(B) Heatmap illustrating overall changes in nucleotide pool sizes in 7947882-treated *M. tuberculosis* compared with control. Data are derived from two biological replicates.

(C) Thin-layer chromatography of nucleotide extract from [<sup>14</sup>C]uracil-labeled *M. tuberculosis* H37Ra grown on glycerol-alanine-salts (GAS) medium. The figure is a representative image from three separate experiments.

(D) Ratio of radioactivity incorporated to [<sup>14</sup>C]UTP and [<sup>14</sup>C]CTP. Nucleotides were extracted from [<sup>14</sup>C]uracil-labeled *M. tuberculosis* H37Ra grown on GAS, or 7H9 media and separated by HPLC. The two columns represent duplicate 2-ml samples removed from the radiolabeled culture, processed separately.

(E) Schematic representation of the major effects of PyrG inhibition in mycobacteria.

See also Figure S3.

The same procedure was used to identify the metabolite(s) derived from 7904688. In this case only one metabolite was found, corresponding to 3-phenyl-*N*-[(4-piperidin-1-yl)phenyl] carbamoyl]propanamide (Figure S2). This derivative likely arises from sequential EthA reactions on the sulfur atom of the carbamothioyl moiety (Chigwada et al., 2014). However, this last metabolite showed no effect on PyrG activity. It is conceivable that the active metabolite(s) of 7904688 might be an unstable intermediate, thus precluding its isolation.

### 7947882 Inhibition of PyrG Alters Nucleotide Metabolism in *M. tuberculosis*

Since PyrG is a key enzyme involved in de novo pyrimidine biosynthesis (Meng et al., 2004), the effect of 7947882 on *M. tuberculosis* nucleotide metabolism was investigated. For this purpose, metabolomic experiments were performed with *M. tuberculosis* exposed for 24 hr to 7947882 (5× MIC) or its solvent, DMSO. Polar metabolites were extracted and analyzed by standard methods (de Carvalho et al., 2010; Larrouy-Maumus et al., 2013) that focused on bases, nucleosides, and nucleotides. *M. tuberculosis* H37Rv cells treated with 7947882 showed a substantial increase in the abundance of all nucleotide intermediates that were detected. Figure 2A illustrates extracted ion chromatograms (EIC) obtained for AMP in *M. tuberculosis* extracts treated with either compound or DMSO alone. Compound-induced changes in abundances of the ions detected are shown in Figure 2B. Taken together, these data demonstrate that direct inhibition of PyrG decreased CTP levels, leading to disruption of the nucleotide metabolic network, characterized by increased levels of several intermediates in the biosynthesis of pyrimidines and purines.

The molecular target of thiophenecarboxamides in mycobacteria was further corroborated through metabolic studies with

[<sup>14</sup>C]uracil and the active metabolite 11426026, using *M. tuberculosis* H37Ra (MIC 4 μg/ml) grown in glycerol-alanine-salts (GAS) medium with or without 11426026 (16 μg/ml) for 1 hr, then [<sup>14</sup>C]uracil was added and radiolabeling continued for 3 hr. In the cells [<sup>14</sup>C]uracil is initially incorporated into [<sup>14</sup>C]uridine monophosphate (UMP) through the action of uracil phosphoribosyltransferase (Upp) from the pyrimidine salvage pathway (Villela et al., 2011). This is then further metabolized to the whole range of nucleotides and sugar nucleotides originating from uracil. After labeling, the cells were harvested and the nucleotide pool was extracted with diluted formic acid (Bochner and Ames, 1982). In the pilot experiment the PyrG substrate [<sup>14</sup>C]UTP was separated from the PyrG product [<sup>14</sup>C]CTP by thin-layer chromatography (TLC). An autoradiograph produced from the TLC plate clearly showed a decrease of [<sup>14</sup>C]CTP relative to [<sup>14</sup>C]UTP in treated *M. tuberculosis* compared with the control (Figure 2C). To quantify the changes, the labeling experiment was repeated under the same conditions and the nucleotides were analyzed by high-performance liquid chromatography (HPLC). Individual fractions co-eluting with the set of standards comprising UMP, uridine diphosphate (UDP), UTP, cytidine monophosphate, cytidine diphosphate, CTP, UDP-Gal, UDP-GlcNAc, and UDP-MurNAc pentapeptide were collected and quantified by measuring their radiolabel levels. Although incorporation of radioactivity into [<sup>14</sup>C]UTP and [<sup>14</sup>C]CTP was rather low in this experiment, the ratio of [<sup>14</sup>C]UTP/[<sup>14</sup>C]CTP did increase in the treated culture, as expected for PyrG inhibition (Figure 2D). Higher incorporation of [<sup>14</sup>C]uracil was achieved by using 7H9/ADC/Tween medium, thereby confirming the trend of increased [<sup>14</sup>C]UTP/[<sup>14</sup>C]CTP following 11426026 treatment (Figure 2D; Figure S3).

In conclusion, these experiments highlighted that inhibition of PyrG affects nucleotide metabolism and, thus, very likely several

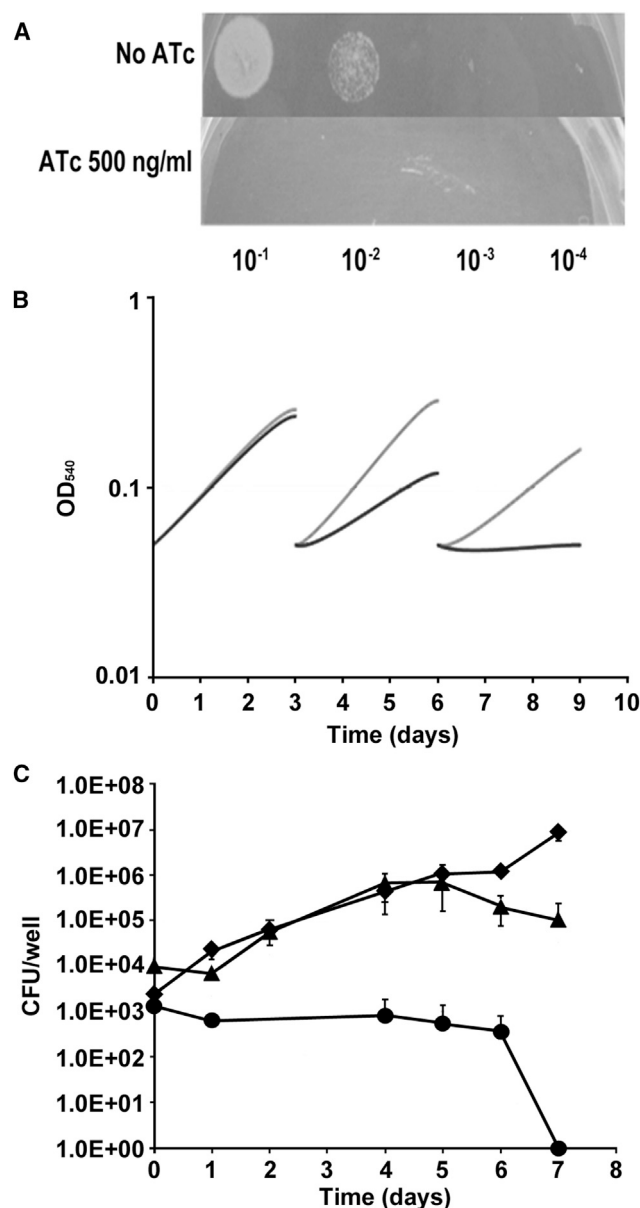

**Figure 3. Essentiality of *pyrG* In Vitro and Ex Vivo**

(A) Ten microliters of a *pyrG* cKD mutant suspension containing about  $10^5$  cfu were spotted at the indicated dilutions on Middlebrook 7H10 plates ( $\pm 500$  ng/ml ATc).

(B) Bacteria were grown in 7H9 medium ( $\pm 500$  ng/ml ATc) and diluted 1:10 in fresh media ( $\pm 500$  ng/ml ATc) every 3 days.  $OD_{540\text{ nm}}$  was recorded and used to compile the growth curves. Each experiment was repeated at least twice. Gray line, *pyrG* conditional mutant grown without ATc; black line, *pyrG* conditional mutant grown with ATc.

(C) Growth of *pyrG* conditional mutant and its parental strain (control) in THP-1-derived macrophages at an MOI of 1:20 (bacteria/macrophage). The results are expressed as cfu per well. The reported values represent the average and the SE obtained from two parallel independent infections. The experiment was repeated twice using independent bacterial inocula and THP-1 cultures. ATc (200 ng/ml) was added or not to the cell culture medium. Circles, *pyrG* conditional mutant plus ATc; diamonds, control plus ATc; triangles, *pyrG* conditional mutant, no ATc.

aspects of mycobacterial physiology. In particular, the metabolic changes should interfere not only with DNA and RNA biosynthesis, but also with other metabolic processes that require nucleotides, such as fatty acid, carbohydrate and amino acid biosynthesis, cell wall biosynthesis, and cAMP- and c-di-AMP-dependent signaling (Figure 2E).

### Validation of *pyrG* Essentiality In Vivo and Ex Vivo

Since *PyrG* inhibition by the active metabolite of 7947882 has been unambiguously demonstrated, its validation as a drug target was further investigated. To show the essentiality of *pyrG* in *M. tuberculosis*, a conditional mutant was constructed where the *pyrG* promoter was replaced by the repressible promoter  $P_{ptr}$  in a strain carrying the TetR-PipOFF repressible system (Boldrin et al., 2010). In this conditional mutant, the expression of *pyrG* was expected to be downregulated by the addition of anhydrotetracycline (ATc) to the culture medium, thus leading to depletion of its protein product. The growth of the *pyrG* conditional mutant was evaluated on solid 7H10 and in liquid 7H9 media ( $\pm$  ATc, 500 ng/ml). In each case, this conditional mutant exhibited inhibition of growth upon ATc exposure, while its parental strain was not affected, thus clearly demonstrating that *PyrG* is essential for *M. tuberculosis* growth in vitro (Figures 3A and 3B).

*PyrG* essentiality was also verified during intracellular growth. For this purpose, THP-1-derived macrophages were infected with the *pyrG* conditional mutant or with its parental strain, and the cells were incubated in the presence or absence of ATc (200 ng/ml). While the control was able to divide intracellularly under both conditions, the *pyrG* conditional mutant grew similarly to the control only in the absence of ATc. When *pyrG* expression was downregulated by ATc, the number of viable bacteria dropped rapidly, demonstrating *pyrG* essentiality also during intracellular growth (Figure 3C). Proof that *PyrG* is essential both in vitro and ex vivo further corroborates the value of this enzyme as a drug target.

### *PyrG* Crystal Structure

The crystal structure of *PyrG* was solved by molecular replacement on a 2.0-Å resolution data set (Table S3). This structure showed a bidomain enzyme with an N-terminal amidoligase (ALase) domain, also commonly known as the synthetase domain (residues 1–278), connected through an interdomain linker (residues 279–Pro298) to a C-terminal glutamine amidotransferase (GATase) domain (residues 299–552), both domains displaying a Rossmann-like fold (Figure 4A). This bidomain architecture is typical of amidotransferases, already observed in the other available structures of full-length bacterial CTP synthetases (Goto et al., 2004; Endrizzi et al., 2004, 2005; Lauritsen et al., 2011). On the other hand, the 34-residue C-terminal extension of *M. tuberculosis* *PyrG*, which has no predicted secondary structure or known function, could not be traced due to the lack of supporting electron density, suggesting a high degree of flexibility.

The enzyme, in complex with either UTP, at 2.0-Å resolution, or UTP plus the non-hydrolyzable ATP analog AMP-PCP and the glutamine analog 5-oxo-L-norleucine (3.5 Å; Table S3), is a homotetramer with crystallographic 222 symmetry (Figure 4A), consistent with previous studies reporting positive cooperativity

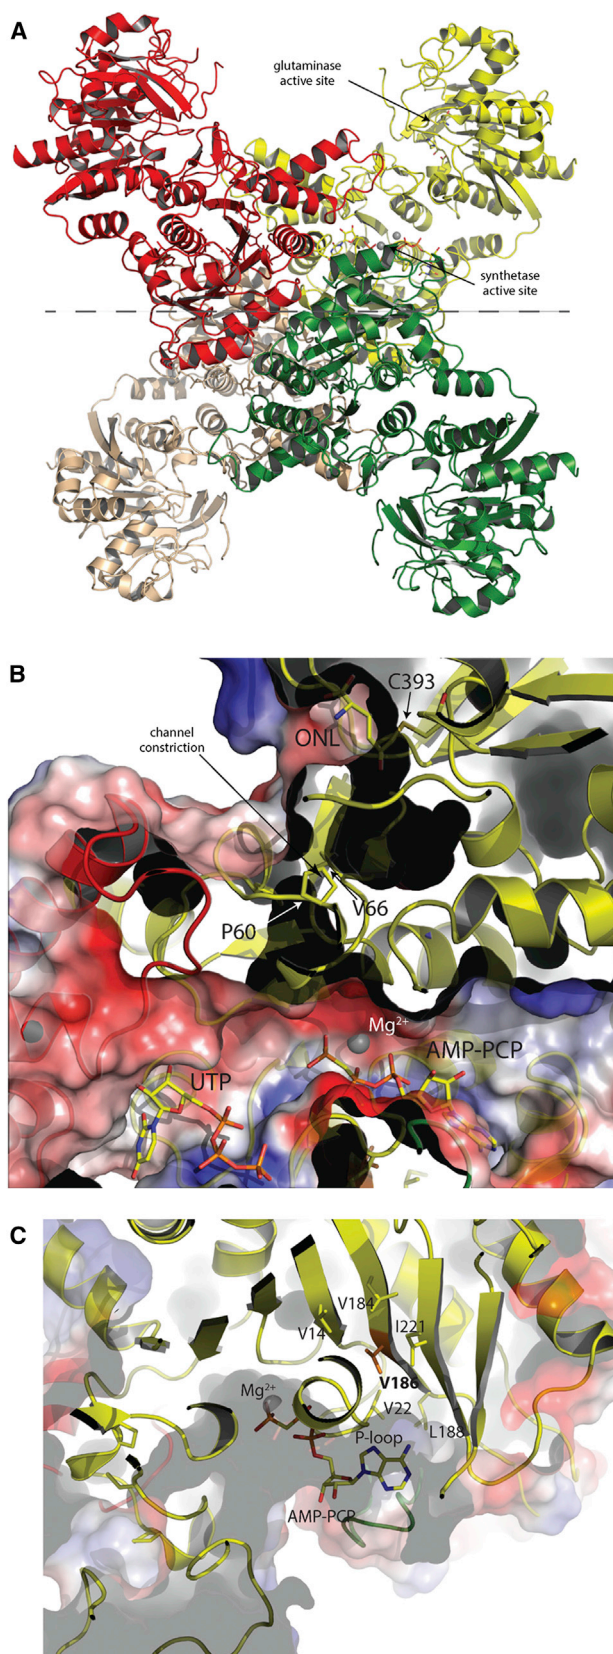

**Figure 4. Crystal Structure of *M. tuberculosis* PyrG**

(A) Tetrameric structure of *M. tuberculosis* PyrG in complex with nucleotides and analogs, i.e. either UTP or UTP/AMP-PCP/L-DON. As observed in the other available crystal structures of CTP synthetases, the N-terminal synthetase domain is positioned at the center of the tetramer while the C-terminal glutaminase domain is pointing outwards. The gray dashed line indicates the PyrG dimers (yellow/red versus green/brown) as they can be found in the apo structure.

(B) Surface “cut-through” of the synthetase active site, with UTP- and ATP-binding pockets, and “cut section” that shows a possible NH<sub>4</sub><sup>+</sup> channel connecting the glutaminase to the synthetase site. The electrostatic surface potential has been calculated and rendered by PyMol (Schroedinger, <http://www.pymol.org>).

(C) Surface view of ATP-binding pocket, occupied by AMP-PCP, to show the location of Val186 (orange) mutated in Gly in the *M. tuberculosis*-resistant strains. Side chains of hydrophobic residues surrounding Val186 are depicted as sticks.

See also Table S3; Figures S4 and S5.

for ATP and UTP due to nucleotide-driven tetramerization. Indeed, another structure of the enzyme in the apo form at lower resolution (3.5 Å; Table S3), revealed a homodimeric protein, each homodimer representing half of the functional tetramer and showing a dimerization surface of ~1,350 Å<sup>2</sup> per monomer (Figure 4A), all in good agreement with previous structural studies (Endrizzi et al., 2004, 2005; Goto et al., 2004; Lauritsen et al., 2011). Also, consistent with the oligomeric assembly as a dimer of dimers being triggered by ATP/UTP, the nucleotide-binding pockets were delimited by residues from two (ATP) or three (UTP) different subunits (Figures S4A and S4B). Surprisingly, in the highest-resolution structure available (Table S3), UTP was found lying in both pockets, a likely artifact due to the high concentration of the nucleotide (5 mM) in the co-crystallization conditions (Figure S4C). It should be noted that the UTP orientation in the substrate-binding pocket is unproductive for the course of the reaction, as the pyrimidine ring points away from ATP. Moreover, this UTP orientation coincides with the CTP orientation observed in *E. coli* PyrG in complex with CTP and ADP (PDB: 2ad5; Figure S4C), suggesting that this structure likely represents an inhibited enzyme (Endrizzi et al., 2005).

In contrast, in the independent crystal form, grown in the presence of AMP-PCP as well as UTP and the glutamine analog 6-diazo-5-oxo-L-norleucine (L-DON), AMP-PCP lies in the ATP-binding site, as expected, with UTP maintaining the same orientation as above (Figures 4B and S4B). In addition, a covalent adduct was observed between the Cys393 sulfur and oxonorleucine, as expected from the reaction with L-DON (Hart and Powers-Lee, 2008), therefore confirming the role of Cys393 as the catalytic nucleophile within a Gln-hydrolyzing triad that includes His524 and Glu526 (Figures S4D and S4E). In agreement with similar observations made on *E. coli* PyrG (Endrizzi et al., 2004), a putative ammonia diffusion channel was visualized connecting the glutaminase active site in the C-terminal domain to the synthetase site at the N-terminal domain (Figure 4B). However, the tunnel is not continuous, but appears to be blocked by the side chains of residues Pro55, Pro60, and Val66, all located on the long β2 to β3 linker that includes the short α2 (Figures S4D and S4E), forming a constriction in the channel (Figure 4B). The residue Val186 mutated to Gly in the *M. tuberculosis*-resistant mutants lies on the β7 strand behind the conserved P loop (Gly16 to Gly25) that contributes



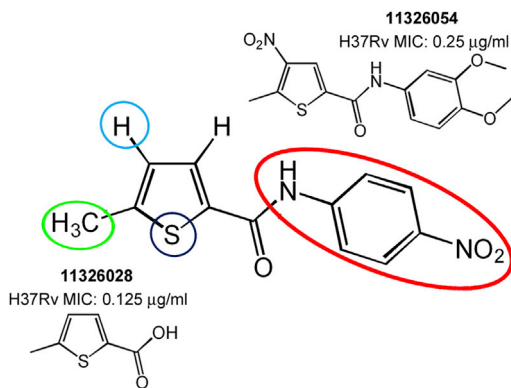

**Figure 5. SAR Optimization Strategy of 7947882 Compound**

Modifications made on the thiophene ring (positions 4, 5 and the sulfur atom) and the 4-nitroaniline moiety led to two more active compounds (11326028 and 11326054).

See also Tables S4 and S5.

to bind the ATP phosphates, its side chain being at closest  $\sim 7$  Å from the AMP-PCP  $\beta$ -phosphate (Figure 4C). Despite being located in the proximity of the ATP-binding pocket, the Val186Gly substitution does not provide any obvious explanation for the resistance profile to an ATP competitive inhibitor. Moreover, this mutation should have a destabilizing effect on the P loop and on its proper positioning within the ATP-binding cleft, leading to a decreased affinity for ATP. This hypothesis, suggested by the observation that the Val186 side chain is situated in a hydrophobic pocket delimited by Val14, Leu22 (belonging to the P loop), Leu184, Leu188, and Ile221 (Figure 4C), is further supported by the steady-state kinetics analysis of the V186G mutant enzyme reported above.

The availability of the *M. tuberculosis* PyrG structure is useful for both structure-activity relationship (SAR) studies and in silico docking approaches to find new PyrG inhibitors that do not require EthA activation.

### SAR Study of 7947882

To improve the antitubercular activity of 7947882, and to understand the substituent requirements needed to achieve activity against *M. tuberculosis*, SAR studies were performed (Figure 5). 105 derivatives of compound 7947882 were synthesized and tested for their activity against *M. tuberculosis* H37Rv. The substitutions concerned mainly the thiophene ring and the 4-nitroaniline moiety.

Substitution of the thiophene ring (with furan, pyrazole, or methylthiazole) led to inactive compounds (Table S4A). The substitution of the 4-nitroaniline led, in general, to decreased potency of the compounds (Table S4B). The presence of the *p*-nitro group was associated with the best MIC, but was not strictly required, since its substitution with halogen atoms or a methyl group caused only a small increase in MIC. Moreover, the addition of further substituents to the other positions of the phenyl ring did not improve efficacy. For instance, introduction of bulkier substituents, such as *S*-methyl or sulfonamide, or the substitution of the aniline with formimidamide derivatives, was even detrimental for activity, as these compounds all showed a higher MIC (Table S4B).

Furthermore, no improvement arose from modification of the substituents in the thiophene moiety. Lack of the methyl group in position 5 of the thiophene led to an increase in the MIC (Table S4C), as did introduction of a methyl or nitro group in position 4, with the exception of compound 11326054 which showed a lower MIC value (0.25  $\mu\text{g/ml}$ ) (Figure 5; Tables S4D and S4E). Curiously, analogs of this compound lacking the nitro group (11326008) did not show lower MIC (2  $\mu\text{g/ml}$ ). Moreover, all compounds with the thiophene moiety substituted with a nitro group showed lower potency than those lacking this group. Such high activity of compound 11326054 is conceivably connected with the antimycobacterial properties of nitrothiophenes (Hartkoon et al., 2014), and in parallel with the amide moiety discussed in this paper.

Finally, substitution of the aniline with a hydroxy group, to give the 5-methylthiophene-2-carboxylic acid (11326028), led to the most potent compound (MIC of 0.128  $\mu\text{g/ml}$ , Figure 5). The carboxylic group of compound 11326028 was fundamental for its antimycobacterial activity, since the carboxamide derivative was less active and, likewise for compound 7947882, modification of the thiophene substituents led to less active derivatives (Table S4F).

The *M. tuberculosis* *pyrG* mutant 88.7 showed levels of resistance to both 11326028 and 11326054 derivatives that were significantly higher (MIC values  $>8$   $\mu\text{g/ml}$ ) compared with that of the wild-type strain, thus confirming that they still target PyrG. Similarly, the 81.10 mutant (mutated in *ethA* gene) was resistant to both compounds, indicating that they still need to be activated by EthA. This result was confirmed by the fact that the compounds are substrates of the enzyme ( $k_{\text{cat}}$  values of  $1.33 \pm 0.02$   $\text{min}^{-1}$  and  $0.98 \pm 0.03$   $\text{min}^{-1}$  for 11326028 and 11326054, respectively).

Finally, five derivatives of the active EthA metabolite 11426026 were synthesized. These compounds were all active toward wild-type PyrG, but not against the V186G mutant. However, none of these compounds showed an improved MIC compared with the active metabolite of 7947882 (Table S5).

### Docking of the 11426026 Active Metabolite and PyrG Inhibitors

To acquire insight into the binding between the active metabolite of 11426026 and PyrG, a careful computational analysis of the possible poses of the compound was performed. Docking the 11426026 compound demonstrated that it would only successfully dock in the PyrG ATP site (Figures S5A, S5B and S5C). The superimposition with the UTP molecule shows a partial overlap. The phenyl ring is suggested to pi-stack with Arg223 while the nitro group is proposed to interact with Ala253 and Asp252.

Similarity searching based on the 4-nitroacetanilide portion of the molecule resulted in 12 similar compounds present in the Collaborative Drug Discovery (CDD) database (Ekins and Bunin, 2013; Ananthan et al., 2009; Ekins et al., 2014; Maddry et al., 2009; Reynolds et al., 2012). Four of these compounds were tested in vitro against PyrG enzymatic activity. One compound, CDD-823953 (LibDock score 106.7), was a weak PyrG inhibitor ( $K_i = 88.9$   $\mu\text{M}$ ). Figures S5D and S5E show how this compound may bind less optimally in the ATP-binding site with the 4-nitroacetanilide portion in a different position to that seen with 11426026. Docking of compounds may be instructive for SAR

until the co-crystal structure with a ligand is obtained. For example, the 11326054 sulfone was also docked in the PyrG structure and was shown to be in an orientation similar to that of the 11426026 active metabolite (Figures S5F and S5G).

## SIGNIFICANCE

**New leads and new targets are required for tuberculosis drug development. Using phenotypic screening of a chemical library, two thiophenecarboxamide derivatives were identified that inhibited *M. tuberculosis* under replicating, non-replicating, and intracellular growth conditions. Both compounds were activated by the EthA monooxygenase, and the main metabolite of one of them (7947882), identified by mass spectrometry, was shown to target the CTP synthetase PyrG. The active metabolite was synthesized and shown to behave as a competitive inhibitor toward the ATP-binding site of PyrG, thus validating this enzyme as a new antitubercular drug target. Further validation was obtained genetically using conditional knockdown of *pyrG* to prove its essentiality in all the physiological states. A metabolomic approach demonstrated that the thiophenecarboxamide derivatives caused general deregulation of nucleotide metabolism, consistent with the inhibition of CTP synthetase. The combined evidence strongly indicates that PyrG is potentially a clinically relevant drug target. To overcome the requirement for EthA activation, we obtained high-resolution crystal structures of PyrG to underpin structure-based drug design. This approach has already generated additional lead compounds that inhibit this new drug target under all conditions tested.**

## EXPERIMENTAL PROCEDURES

### NIAID Library Screening

CB2, a library of 594 compounds selected from an HTS screen on *M. tuberculosis* H37Rv (Ananthan et al., 2009; Goldman and Laughon, 2009; Maddy et al., 2009), was kindly provided by NIAID (Prof. R.C. Goldman). These compounds were initially screened at 10  $\mu$ g/ml in duplicate for activity against H37Rv and ss18b in 96-well format, using the resazurin reduction microtiter assay. Compounds with a percentage of inhibition of H37Rv growth of more than 80% were subsequently analyzed for their MIC, intracellular activity against H37Rv, and cytotoxicity against the human hepatocellular carcinoma cell line HepG2 and Huh7, the human lung epithelial cell line A549, and the murine macrophage cell line RAW 264.7 (see Supplemental Experimental Procedures).

### Compounds Used and Synthesis of Their Derivatives

7904688 and 7947882 were purchased from ChemBridge Corp (<http://www.chembridge.com/index.php>). Synthetic routes of thiophene derivatives, experimental details, and compound characterization data are provided in the Supplemental Experimental Procedures.

### Isolation and Characterization of *M. tuberculosis* Mutants Resistant to 7947882 and 7904688

The isolation of *M. tuberculosis* mutants was performed by plating  $\sim 10^{10}$  cells from an exponential growth phase wild-type culture onto 7H11 medium containing different concentrations of 7947882 and 7904688, ranging from 5- to 20-fold the MIC of the wild-type strain.

Genomic DNA of *M. tuberculosis*-resistant mutants and wild-type strain was isolated and sequenced by using Illumina HiSeq2000 technology at IGA Technology Services (Udine, Italy). For the bioinformatic analysis of Illumina data, repetitive PE and PPE gene families were discarded as well as SNPs and indels

with less than 50% probability. The mutations found in *ethA* (*Rv3854c*) and *pyrG* (*Rv1699*) (<http://tuberculist.epfl.ch/>) were confirmed by Sanger sequencing (Eurofins MWG Operon), after PCR amplification using the oligonucleotides presented in the Supplemental Information. PCR products were purified using the Wizard SV Gel and PCR Clean-Up system (Promega).

### Overexpression of *ethA* in *M. tuberculosis* H37Rv

*M. tuberculosis ethA* was cloned into pSODIT-2, a shuttle expression vector containing the hygromycin resistance determinant, after PCR amplification using primers indicated in the Supplemental Information, *Pfu* DNA Polymerase (Promega), and genomic DNA as template. PCR fragments were digested with *Bam*HI and *Hind*III and ligated to the pSODIT-2 generating pSODIT/*ethA*. *M. tuberculosis* H37Rv competent cells were transformed with pSODIT-2 or pSODIT/*ethA*, and plated onto complete Middlebrook 7H11 agar plates supplemented with 20  $\mu$ g/ml hygromycin and different concentrations of 7947882 or 7904688, ranging from 0.125 to 20  $\mu$ g/ml.

### Enzyme Production and Characterization

*M. tuberculosis* PyrG and EthA were obtained in recombinant forms in *E. coli* and purified by standard methods. Enzymatic assays were performed according to the published methods (Fraaije et al., 2004; Lunn et al., 2008). See also Supplemental Experimental Procedures.

### Construction of a *M. tuberculosis pyrG* Knockdown Mutant

The first 714 bp of *pyrG* coding sequence was amplified using RP1609 and RP1610 primers and cloned in the suicide plasmid pFRA170 downstream of a  $P_{ptr}$ -derived promoter. To replace *pyrG* promoter with  $P_{ptr}$ , 10  $\mu$ g of this plasmid was used to transform TB38, an H37Rv derivative harboring the TetR-PipOFF system in its genome at the L5 *attB* site (Boldrin et al., 2010). Selection of recombinants was achieved using 7H10 agar plates containing hygromycin (50  $\mu$ g/ml). Integration of the suicide plasmid was confirmed by PCR. Since *pyrG* might be co-transcribed with its downstream genes (*rv1700-rv1701*), the latter genes were provided in *trans* on a pMV261-derived plasmid. In this way the final *pyrG* conditional knockdown (cKD) strain was obtained. This cKD strain was used for *pyrG* essentiality evaluation in both in vitro and ex vivo experiments (see Supplemental Experimental Procedures).

### PyrG Crystallization, Data Collection, and Structure Determination

Crystallization screenings of PyrG in the presence of various ligands were carried out at 18°C by sitting drop in 96-well format (200 + 200 nl drops) with a Mosquito dispensing robot (TTP Labtech). Crystals were identified in several conditions. PyrG in apo form: 10% PEG8000, 200 mM Ca acetate, 100 mM HEPES (pH 7.5); complex with UTP: 17% PEG20000, 100 mM MgCl<sub>2</sub>, 100 mM Tris-HCl (pH 8.5); complex with AMP-PCP, UTP, and L-DON: 30% PEG2000 MME, 100 mM NaCl, 100 mM bicine (pH 9.0). All data sets were collected on the Proxima-1 beamline at the Soleil synchrotron (Gif-sur-Yvette, France) from single crystals at 100 K, processed with XDS (Kabsch, 2010) and merged with Aimless from the CCP4 suite (Winn et al., 2011). The structure was first solved by molecular replacement with the program MOLREP (Murshudov et al., 1997) on a data set collected from a PyrG-UTP crystal, using the structure of *Thermus thermophilus* CTP synthetase in complex with sulfate (PDB: 1vcn; Goto et al., 2004) as the search model. Refinement was carried out with Refmac5 (Murshudov et al., 2011) or autoBUSTER (Bricogne et al., 2011). The other data sets were solved by molecular replacement with MOLREP and the coordinates of a partially refined *M. tuberculosis* PyrG structure as the search model. Final models were validated through the Molprobity server (Chen et al., 2010). Docking of PyrG inhibitors was performed as described in the Supplemental Experimental Procedures.

### In Vitro EthA Metabolite Production and Identification

For in vitro EthA metabolite production, 30 mg of 7947882 was incubated with 10 mg of EthA in 50 mM potassium phosphate (pH 8.0), 500  $\mu$ M NADPH, 10  $\mu$ M BSA, at 37°C for 5 hr under agitation. To produce the PyrG-EthA metabolite complex, the EthA reaction was performed in the presence of 45  $\mu$ M PyrG. Reaction products were purified and analyzed as described in Supplemental Experimental Procedures.

### Metabolomic Experiments

Experimental Procedures have been described elsewhere (Larrouy-Maumus et al., 2013; Brauer et al., 2006). In brief, *M. tuberculosis* H37Rv was grown initially in 7H9 (with 0.5 g/l BSA, 0.05% tyloxapol, 0.2% glycerol, 0.2% glucose, and 0.085% NaCl) until late logarithmic phase ( $OD_{600} = 1.0$ ) and 1 ml was layered onto 22-mm nitrocellulose filters (0.22  $\mu$ m) under vacuum filtration. *M. tuberculosis*-laden filters were placed atop 7H10 (supplemented as 7H9) and incubated at 37°C for 5 days, after which the filters were transferred to 7H10 containing 7947882 (5 $\times$  MIC = 2.5  $\mu$ g/ml) or the control. After 24 hr, the bacteria were metabolically quenched by plunging *M. tuberculosis*-laden filters into acetonitrile/methanol/H<sub>2</sub>O (2:2:1) pre-cooled to -40°C. The metabolites were extracted by mechanical lysing of the *M. tuberculosis*-containing solution with 0.1-mm zirconia beads. Lysates were clarified by centrifugation, filtered, and metabolites analyzed by liquid chromatography-mass spectrometry as described in Supplemental Experimental Procedures.

For metabolic labeling of *M. tuberculosis* H37Ra with [<sup>14</sup>C]uracil, 10 ml of the GAS medium (Takayama et al., 1975) was inoculated in the ratio 1:100 with an *M. tuberculosis* H37Ra pre-culture grown in Sauton medium. After 7 days of static growth at 37°C, the culture was split into two aliquots, and 11426026 (final concentration of 16  $\mu$ g/ml) was added to one and DMSO to the other as a control. After 1 hr, [<sup>14</sup>C]uracil (American Radiolabeled Chemicals, specific activity 53 mCi/mmol) was added to a final concentration 1  $\mu$ Ci/ml. Radiolabeling was carried out for 3 hr, then two 2-ml batches were removed from each culture. The bacteria were harvested by centrifugation, washed twice with a cold physiologic solution, and immediately extracted with 110  $\mu$ l of ice-cold 9% (v/v) formic acid for 30 min. The formic acid extract was recovered by centrifugation and its radioactivity was quantified by scintillation spectrometry in 5 ml of EcoLite scintillation liquid (MP Biomedicals). The nucleotide extract was stored at -20°C and was typically analyzed by TLC or HPLC within 24 hr (see Supplemental Experimental Procedures). Alternatively, radiolabeling was performed as above with *M. tuberculosis* H37Ra culture grown to  $OD_{600} = 0.375$  in 7H9 medium at 37°C.

### ACCESSION NUMBERS

The PDB accession numbers for coordinates and structure factors of the crystal structures described here are PDB: 4ZDI (PyrG in apo form); PDB: 4ZDJ (PyrG in complex with two molecules of UTP/Mg<sup>2+</sup>); and PDB: 4ZDK (PyrG in complex with UTP, AMP-PCP, Mg<sup>2+</sup>, and 5-oxo-L-norleucine).

### SUPPLEMENTAL INFORMATION

Supplemental Information includes Supplemental Experimental Procedures, five figures, list of oligonucleotide primers, and five tables and can be found with this article online at <http://dx.doi.org/10.1016/j.chembiol.2015.05.016>.

### AUTHOR CONTRIBUTIONS

R.C.H. performed the screening of NIAID library procured by S.T.C.; G.M., A.L.d.J.L.R., and M.R.P. isolated and characterized the resistant mutants; M.F. performed bioinformatics analysis of Illumina data; G.M., L.R.C., M.E., and N.B. performed cloning, and protein expression and purification; L.R.C. and M.E. performed enzymatic assays; L.R.C., M.E., and A.P. performed metabolite isolation and identification; V.M., E.K., and A.L. performed derivative synthesis; G.D. and F.B. performed studies on *pyrG* essentiality; L.B.M., I.C., Z.S., and J.B. performed metabolomic studies; M.B. performed crystallographic studies; S.E. and M.B. performed docking experiments; R.F., G.Z., V.M., R.M., L.P.S.C., A.R.B., K.M., P.M.A., G.R., S.T.C., and M.R.P. supervised and directed the work; L.R.C., M.B., S.E., R.F., G.Z., V.M., R.M., L.P.S.C., A.R.B., K.M., G.R., S.T.C., and M.R.P. wrote the paper. All authors discussed the results and commented on the manuscript.

### ACKNOWLEDGMENTS

We thank R.C. Goldman and the NIAID for providing the CB2 set; J. Bellalou and F. Levi-Acobas (Institut Pasteur, Paris, France) for their help in protein production; Synchrotron Soleil (Gif-sur-Yvette, France) for access to the beamline

Proxima-1, as well as the beamline staff for the helpful assistance; Biovia for providing Discovery Study.

The research leading to these results received funding mainly from the European Community's Seventh Framework Program (Grant 260872). Additional funding was from the Slovak Research and Development Agency (Contract No. DO7RP-0015-11), the Francis Crick Institute which receives core funding from Cancer Research UK, the UK Medical Research Council (MC\_UP\_A253\_1111), and the Wellcome Trust. The CDD TB database was funded by the Bill and Melinda Gates Foundation (Grant no. 49852). L.B.M. receives partial support from the FAPESP (2011/21232-1), CNPq (140079/2013-0), and CAPES PDSE (99999.003125/2014-09) programs.

Received: April 24, 2015

Revised: May 25, 2015

Accepted: May 30, 2015

Published: June 18, 2015

### REFERENCES

- Ananthan, S., Faaleolea, E.R., Goldman, R.C., Hobrath, J.V., Kwong, C.D., Laughon, B.E., Maddy, J.A., Mehta, A., Rasmussen, L., Reynolds, R.C., et al. (2009). High-throughput screening for inhibitors of *Mycobacterium tuberculosis* H37Rv. *Tuberculosis (Edinb)* 89, 334–353.
- Anderson, P.M. (1983). CTP synthetase from *Escherichia coli*: an improved purification procedure and characterization of hysteretic and enzyme concentration effects on kinetic properties. *Biochemistry* 22, 3285–3292.
- Baulard, A.R., Betts, J.C., Engohang-Ndong, J., Quan, S., McAdam, R.A., Brennan, P.J., Loch, C., and Besra, G.S. (2000). Activation of the pro-drug ethionamide is regulated in mycobacteria. *J. Biol. Chem.* 275, 28326–28331.
- Bochner, B.R., and Ames, B.N. (1982). Complete analysis of cellular nucleotides by two-dimensional thin layer chromatography. *J. Biol. Chem.* 257, 9759–9769.
- Boldrin, F., Casonato, S., Dainese, E., Sala, C., Dhar, N., Palù, G., Riccardi, G., Cole, S.T., and Manganelli, R. (2010). Development of a repressible mycobacterial promoter system based on two transcriptional repressors. *Nucleic Acids Res.* 38, e134.
- Brauer, M.J., Yuan, J., Bennett, B.D., Lu, W., Kimball, E., Botstein, D., and Rabinowitz, J.D. (2006). Conservation of the metabolomic response to starvation across two divergent microbes. *Proc. Natl. Acad. Sci. USA* 103, 19302–19307.
- Bricogne, G., Blanc, E., Brandl, M., Flensburg, C., Keller, P., Paciorek, W., Roversi, P., Sharff, A., Smart, O.S., Vornheim, C., and Womack, T.O. (2011). Buster, Version 2.11.1 (Global Phasing Ltd).
- Chen, V.B., Arendall, W.B., Headd, J.J., Keedy, D.A., Immormino, R.M., Kapral, G.J., Murray, L.W., Richardson, J.S., and Richardson, D.C. (2010). MolProbity: all-atom structure validation for macromolecular crystallography. *Acta Crystallogr. D Biol. Crystallogr.* 66, 12–21.
- Chigwada, T., Mbiya, W., Chipiso, K., and Simoyi, R.H. (2014). S-oxygenation of thiocarbamides V: oxidation of tetramethylthiourea by chlorine in slightly acidic media. *J. Phys. Chem. A* 118, 5903–5914.
- de Carvalho, L.P., Zhao, H., Dickinson, C.E., Arango, N.M., Lima, C.D., Fischer, S.M., Querfelli, O., Nathan, C., and Rhee, K.Y. (2010). Activity-based metabolomic profiling of enzymatic function: identification of Rv1248c as a mycobacterial 2-hydroxy-3-oxoadipate synthase. *Chem. Biol.* 17, 323–332.
- Dover, L.G., Alahari, A., Grattraud, P., Gomes, J.M., Bhowruth, V., Reynolds, R.C., Besra, G.S., and Kremer, L. (2007). EthA, a common activator of thiocarbamide-containing drugs acting on different mycobacterial targets. *Antimicrob. Agents Chemother.* 51, 1055–1063.
- Ekins, S., and Bunin, B.A. (2013). The collaborative drug discovery (CDD) database. *Methods Mol. Biol.* 993, 139–154.
- Ekins, S., Freundlich, J.S., Hobrath, J.V., Lucile White, E., and Reynolds, R.C. (2014). Combining computational methods for hit to lead optimization in *Mycobacterium tuberculosis* drug discovery. *Pharm. Res.* 31, 414–435.

- Endrizzi, J.A., Kim, H., Anderson, P.M., and Baldwin, E.P. (2004). Crystal structure of *Escherichia coli* cytidine triphosphate synthetase, a nucleotide-regulated glutamine amidotransferase/ATP-dependent amidoligase fusion protein and homologue of anticancer and antiparasitic drug targets. *Biochemistry* *43*, 6447–6463.
- Endrizzi, J.A., Kim, H., Anderson, P.M., and Baldwin, E.P. (2005). Mechanisms of product feedback regulation and drug resistance in cytidine triphosphate synthetases from the structure of a CTP-inhibited complex. *Biochemistry* *44*, 13491–13499.
- Fraaije, M.W., Kamerbeek, N.M., Heidekamp, A.J., Fortin, R., and Janssen, D.B. (2004). The prodrug activator EtaA from *Mycobacterium tuberculosis* is a Baeyer-Villiger monooxygenase. *J. Biol. Chem.* *279*, 3354–3360.
- Goldman, R.C., and Laughon, B.E. (2009). Discovery and validation of new antitubercular compounds as potential drug leads and probes. *Tuberculosis* *89*, 331–333.
- Goto, M., Omi, R., Nakagawa, N., Miyahara, I., and Hirotsu, K. (2004). Crystal structures of CTP synthetase reveal ATP, UTP, and glutamine binding sites. *Structure* *12*, 1413–1423.
- Hart, E.J., and Powers-Lee, S.G. (2008). Mutation analysis of carbamoyl phosphate synthetase: does the structurally conserved glutamine amidotransferase triad act as a functional dyad? *Protein Sci.* *17*, 1120–1128.
- Hartkoorn, R.C., Ryabova, O.B., Chiarelli, L.R., Riccardi, G., Makarov, V., and Cole, S.T. (2014). The mechanism of action of 5-nitrothiophenes against *Mycobacterium tuberculosis*. *Antimicrob. Agents Chemother.* *58*, 2944–2947.
- Kabsch, W. (2010). XDS. *Acta Crystallogr. D Biol. Crystallogr.* *66*, 125–132.
- Larrouy-Maumus, G., Biswas, T., Hunt, D.M., Kelly, G., Tsodikov, O.V., and de Carvalho, L.P. (2013). Discovery of a glycerol 3-phosphate phosphatase reveals glycerophospholipid polar head recycling in *Mycobacterium tuberculosis*. *Proc. Natl. Acad. Sci. USA* *110*, 11320–11325.
- Lauritsen, I., Willemoës, M., Jensen, K.F., Johansson, E., and Harris, P. (2011). Structure of the dimeric form of CTP synthase from *Sulfolobus solfataricus*. *Acta Crystallogr. Sect. F Struct. Biol. Cryst. Commun.* *67*, 201–208.
- Lechartier, B., Rybniker, J., Zumla, A., and Cole, S.T. (2014). Tuberculosis drug discovery in the post-post-genomic era. *EMBO Mol. Med.* *6*, 158–168.
- Long, C.W., and Pardee, A.B. (1967). Cytidine triphosphate synthetase of *Escherichia coli* B. *J. Biol. Chem.* *242*, 4715–4721.
- Lunn, F.A., MacDonnell, J.E., and Bearne, S.L. (2008). Structural requirements for the activation of *Escherichia coli* CTP synthase by the allosteric effector GTP are stringent, but requirements for inhibition are lax. *J. Biol. Chem.* *283*, 2010–2020.
- Maddry, J.A., Ananthan, S., Goldman, R.C., Hobrath, J.V., Kwong, C.D., Maddox, C., Rasmussen, L., Reynolds, R.C., Secrist, J.A., Sosa, M.I., et al. (2009). Antituberculosis activity of the molecular libraries screening center network library. *Tuberculosis* *89*, 354–363.
- Meng, Q., Turnbough, C.L., and Switzer, R.L. (2004). Attenuation control of *pyrG* expression in *Bacillus subtilis* is mediated by CTP-sensitive reiterative transcription. *Proc. Natl. Acad. Sci. USA* *101*, 10943–10948.
- Murshudov, G.N., Vagin, A.A., and Dodson, E.J. (1997). Refinement of macromolecular structures by the maximum-likelihood method. *Acta Crystallogr. D Biol. Crystallogr.* *53*, 240–255.
- Murshudov, G.N., Skubák, P., Lebedev, A.A., Pannu, N.S., Steiner, R.A., Nicholls, R.A., Winn, M.D., Long, F., and Vagin, A.A. (2011). REFMAC5 for the refinement of macromolecular crystal structures. *Acta Crystallogr. D Biol. Crystallogr.* *67*, 355–367.
- Reynolds, R.C., Ananthan, S., Faaleolea, E., Hobrath, J.V., Kwong, C.D., Maddox, C., Rasmussen, L., Sosa, M.I., Thammasuvimol, E., White, E.L., et al. (2012). High throughput screening of a library based on kinase inhibitor scaffolds against *Mycobacterium tuberculosis* H37Rv. *Tuberculosis* *92*, 72–83.
- Sala, C., Dhar, N., Hartkoorn, R.C., Zhang, M., Ha, Y.H., Schneider, P., and Cole, S.T. (2010). Simple model for testing drugs against nonreplicating *Mycobacterium tuberculosis*. *Antimicrob. Agents Chemother.* *54*, 4150–4158.
- Sassetti, C.M., Boyd, D.H., and Rubin, E.J. (2001). Comprehensive identification of conditionally essential genes in mycobacteria. *Proc. Natl. Acad. Sci. USA* *98*, 12712–12717.
- Takayama, K., Schnoes, H.K., Armstrong, E.L., and Boyle, R.W. (1975). Site of inhibitory action of isoniazid in the synthesis of mycolic acids in *Mycobacterium tuberculosis*. *J. Lipid. Res.* *16*, 308–317.
- Vannelli, T., Dykman, A., and Ortiz de Montellano, P.R. (2002). The antituberculosis drug ethionamide is activated by a flavoprotein monooxygenase. *J. Biol. Chem.* *277*, 12824–12829.
- Villela, A.D., Sanchez-Quitian, Z.A., Ducati, R.G., Santos, D.S., and Basso, L.A. (2011). Pyrimidine salvage pathway in *Mycobacterium tuberculosis*. *Curr. Med. Chem.* *18*, 1286–1298.
- WHO. (2014). Global Tuberculosis Report 2014 (World Health Organization). [www.who.int](http://www.who.int).
- Willemoës, M., Mølgaard, A., Johansson, E., and Martinussen, J. (2005). Lid L11 of the glutamine amidotransferase domain of CTP synthase mediates allosteric GTP activation of glutaminase activity. *FEBS J.* *272*, 856–864.
- Winn, M.D., Ballard, C.C., Cowtan, K.D., Dodson, E.J., Emsley, P., Evans, P.R., Keegan, R.M., Krissinel, E.B., Leslie, A.G.W., McCoy, A., et al. (2011). Overview of the CCP4 suite and current developments. *Acta Crystallogr. D Biol. Crystallogr.* *67*, 235–242.
- Zhang, M., Sala, C., Hartkoorn, R.C., Dhar, N., Mendoza-Losana, A., and Cole, S.T. (2012). Streptomycin-starved *Mycobacterium tuberculosis* 18b, a drug discovery tool for latent tuberculosis. *Antimicrob. Agents Chemother.* *56*, 5782–5789.

**Supplemental Information**

**Thiophenecarboxamide Derivatives Activated by**

**EthA Kill *Mycobacterium tuberculosis* by**

**Inhibiting the CTP Synthetase PyrG**

**Giorgia Mori, Laurent R. Chiarelli, Marta Esposito, Vadim Makarov, Marco Bellinzoni, Ruben C. Hartkoorn, Giulia Degiacomi, Francesca Boldrin, Sean Ekins, Ana Luisa de Jesus Lopes Ribeiro, Leonardo B. Marino, Ivana Centárová, Zuzana Svetlíková, Jaroslav Blaško, Elena Kazakova, Alexander Lepioshkin, Nathalie Barilone, Giuseppe Zanoni, Alessio Porta, Marco Fondi, Renato Fani, Alain R. Baulard, Katarína Mikušová, Pedro M. Alzari, Riccardo Manganelli, Luiz Pedro S. de Carvalho, Giovanna Riccardi, Stewart T. Cole, and Maria Rosalia Pasca**

## SUPPLEMENTAL INFORMATION

### Thiophenecarboxamide derivatives activated by EthA kill *Mycobacterium tuberculosis* by inhibiting the CTP synthetase PyrG

Giorgia Mori, Laurent R. Chiarelli, Marta Esposito, Vadim Makarov, Marco Bellinzoni, Ruben C. Hartkoorn, Giulia Degiacomi, Francesca Boldrin, Sean Ekins, Ana Luisa de Jesus Lopes Ribeiro, Leonardo B. Marino, Ivana Centárová, Zuzana Svetlíková, Jaroslav Blaško, Elena Kazakova, Alexander Lepioshkin, Nathalie Barilone, Giuseppe Zanoni, Alessio Porta, Marco Fondi, Renato Fani, Alain R. Baulard, Katarína Mikušová, Pedro M. Alzari, Riccardo Manganelli, Luiz Pedro S. de Carvalho, Giovanna Riccardi, Stewart T. Cole, and Maria Rosalia Pasca.

### INVENTORY OF SUPPLEMENTAL INFORMATION

- Figure S1** Inhibition of PyrG activity by 11426026. Related to Figure 1
- Figure S2** Identification of in vitro EthA metabolite(s) of 7904688. Related to Figure 1
- Figure S3** HPLC analysis of [<sup>14</sup>C]-uracil-labeled nucleotide extracts from *M. tuberculosis* H37Ra grown in 7H9/ADC/Tween media. Related to Figure 2.
- Figure S4** Representation of PyrG in complex with different ligands. Related to Figure 4.
- Figure S5** Docking of PyrG inhibitors. Related to Figure 4.

### List of oligonucleotide primers used in this study, related to Experimental Procedures

- Table S1** Profile of resistance of *M. tuberculosis* cells overexpressing *ethA*. Related to Table 2.
- Table S2** MIC values to 11426026 of *ethA* and *pyrG* *M. tuberculosis* mutant strains . Related to Figure 1.
- Table S3** Crystallographic data collection and refinement statistics. Related to Figure 3.
- Table S4** MIC values of 7947882 derivatives. Related to Figure 5. (Excel File)
- Table S5** Biological and biochemical characterization of 11426026 derivatives. Related to Figure 5.

### Supplemental Experimental Procedures

## SUPPLEMENTARY FIGURES

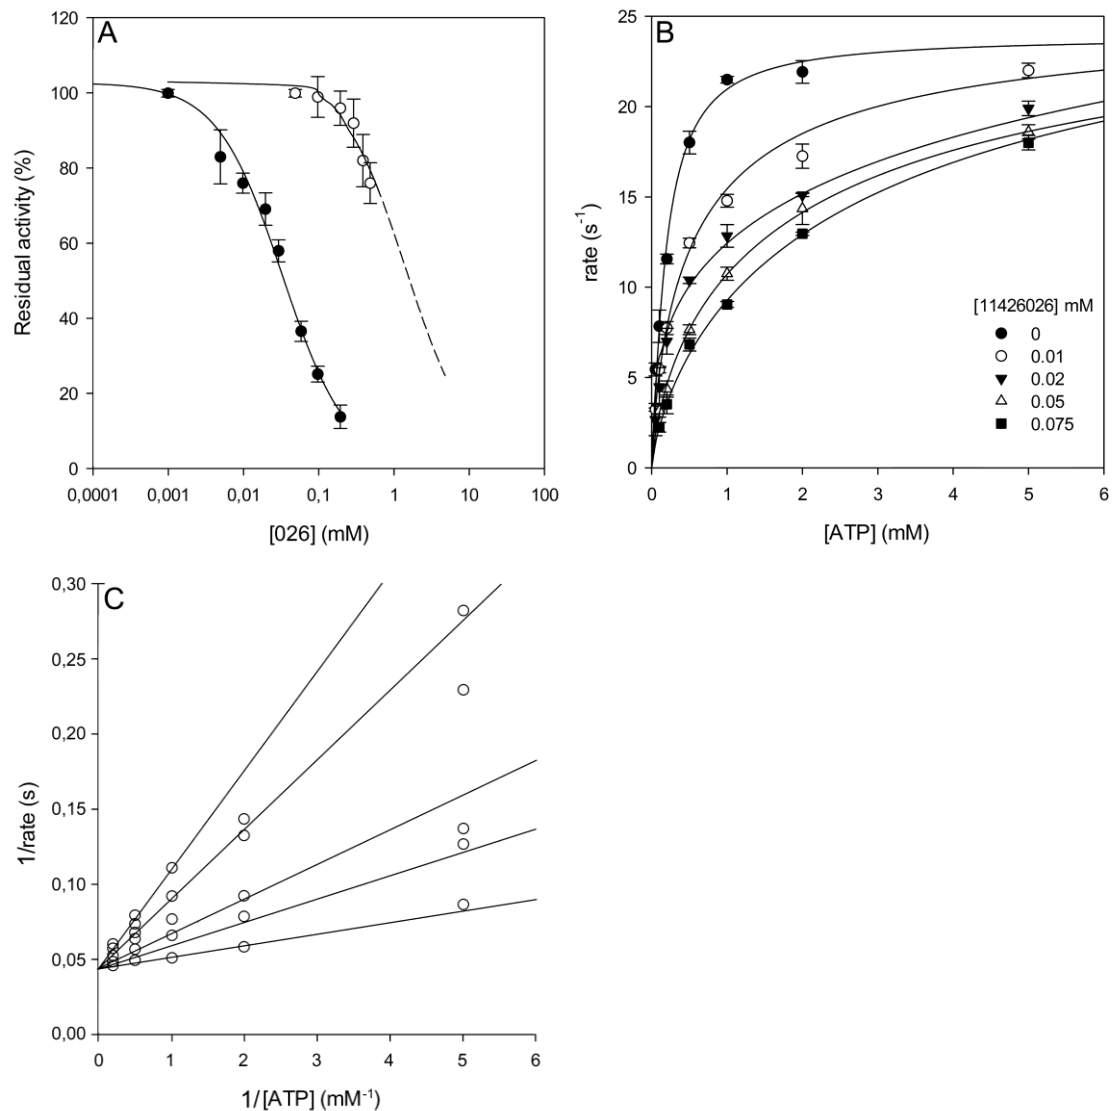

### Figure S1 related to Figure 1. Inhibition of PyrG activity by 11426026 compound

(A)  $IC_{50}$  determination for 11426026 against wild type (closed symbols) and V186G mutant (open symbols) PyrG.  $IC_{50}$  values were determined at concentrations of ATP corresponding to the  $K_m$  values for each enzyme (0.2 mM for the wild-type and 1.5 mM for the mutant), and by fitting the experimental data as reported in Materials and Methods.

(B) Steady state kinetics analysis towards ATP of PyrG in the presence of different concentrations of 11426026 compound highlights the competitive behavior of the inhibitor.

(C) Global reciprocal plot of data in panel B.

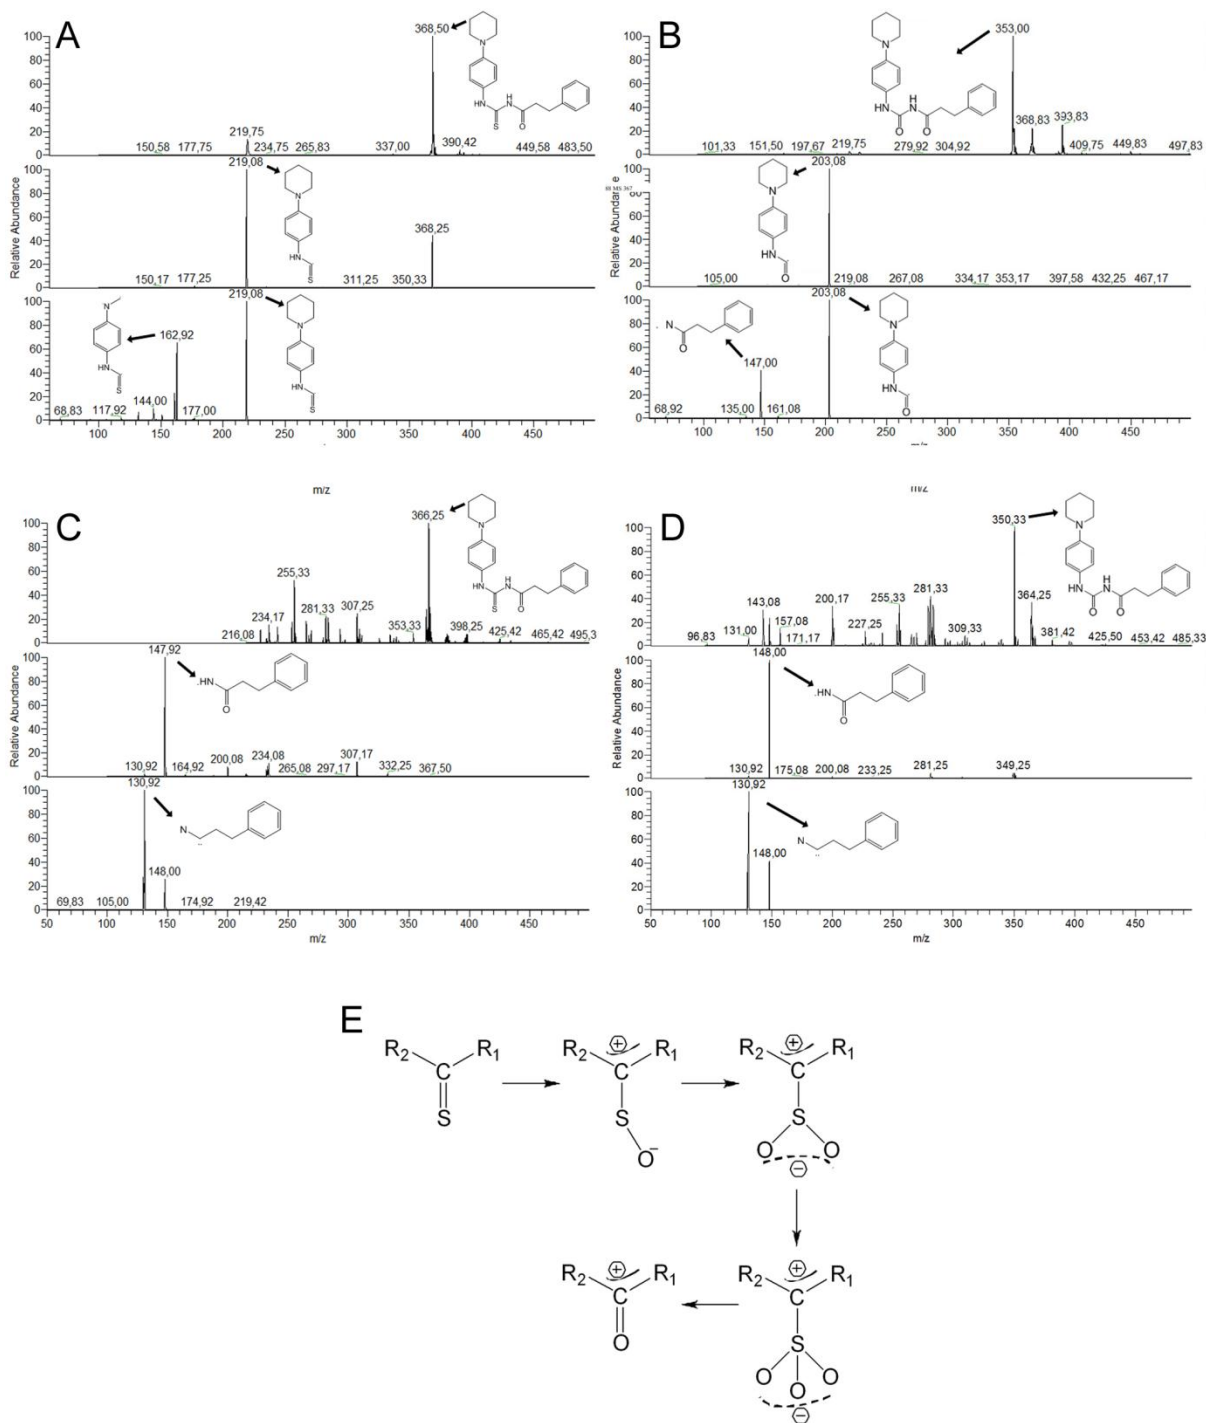

**Figure S2, related to Figure 1. Identification of *in vitro* EthA metabolite(s) of 7904688**

- (A) Mass spectrometry analysis of the 7904688 in positive mode, MS2 and MS3 fragmentations.  
 (B) mass spectrometry analysis of the EthA metabolite of 7904688 in positive mode, MS2 and MS3 fragmentations.  
 (C) mass spectrometry analysis of 7904688 in negative mode, MS2 and MS3 fragmentations.  
 (D) mass spectrometry analysis of the EthA metabolite of 7904688 compound in negative mode.  
 (E) Hypothesized EthA mediated oxygenation reactions of 7904688, leading to the final metabolite.



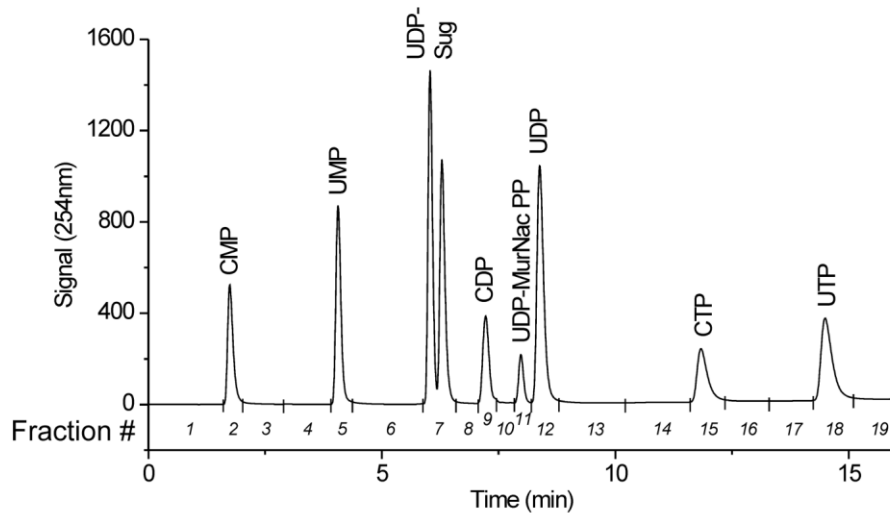

| Fraction #     | Control    |            | 11426026    |             |            |
|----------------|------------|------------|-------------|-------------|------------|
|                | A          | B          | A           | B           |            |
| 1              | 61         | 321        | 59          | 69          | CMP        |
| 2              | 2          | 4          | 2           | 8           |            |
| 3              | 0          | 0          | 0           | 0           |            |
| 4              | 18         | 24         | 13          | 44          | UMP        |
| 5              | 991        | 888        | 1563        | 1358        |            |
| 6              | 128        | 44         | 29          | 43          |            |
| 7              | 4323       | 3620       | 3418        | 3107        | UDP-sugars |
| 8              | 28         | 0          | 0           | 0           | CDP        |
| 9              | 422        | 344        | 22          | 7           |            |
| 10             | 12         | 72         | 37          | 41          |            |
| 11             | 0          | 0          | 0           | 0           | UDP-Mur-PP |
| 12             | 302        | 288        | 220         | 257         | UDP        |
| 13             | 1          | 0          | 0           | 0           | CTP        |
| 14             | 12         | 0          | 21          | 0           |            |
| 15             | 362        | 319        | 155         | 168         |            |
| 16             | 2          | 0          | 0           | 0           | UTP        |
| 17             | 24         | 0          | 1           | 5           |            |
| 18             | 1346       | 1384       | 2434        | 2089        |            |
| 19             | 64         | 45         | 49          | 42          |            |
| <b>UTP/CTP</b> | <b>3.7</b> | <b>4.3</b> | <b>15.7</b> | <b>12.4</b> |            |

**Figure S3 related to Figure 2. HPLC analysis of [<sup>14</sup>C]-uracil-labeled nucleotide extracts from *M. tuberculosis* H37Ra grown in 7H9/ADC/Tween media**

Approximately 7,000 dpm was loaded on HPLC and separated as described in Methods. The fractions were collected as shown in the chromatogram. Radioactivity in the individual fractions was quantified by scintillation spectrometry and is shown in the table. The experiment was performed with duplicate 2 ml samples (A, B) removed from each radiolabeled culture, which were processed and analysed separately.

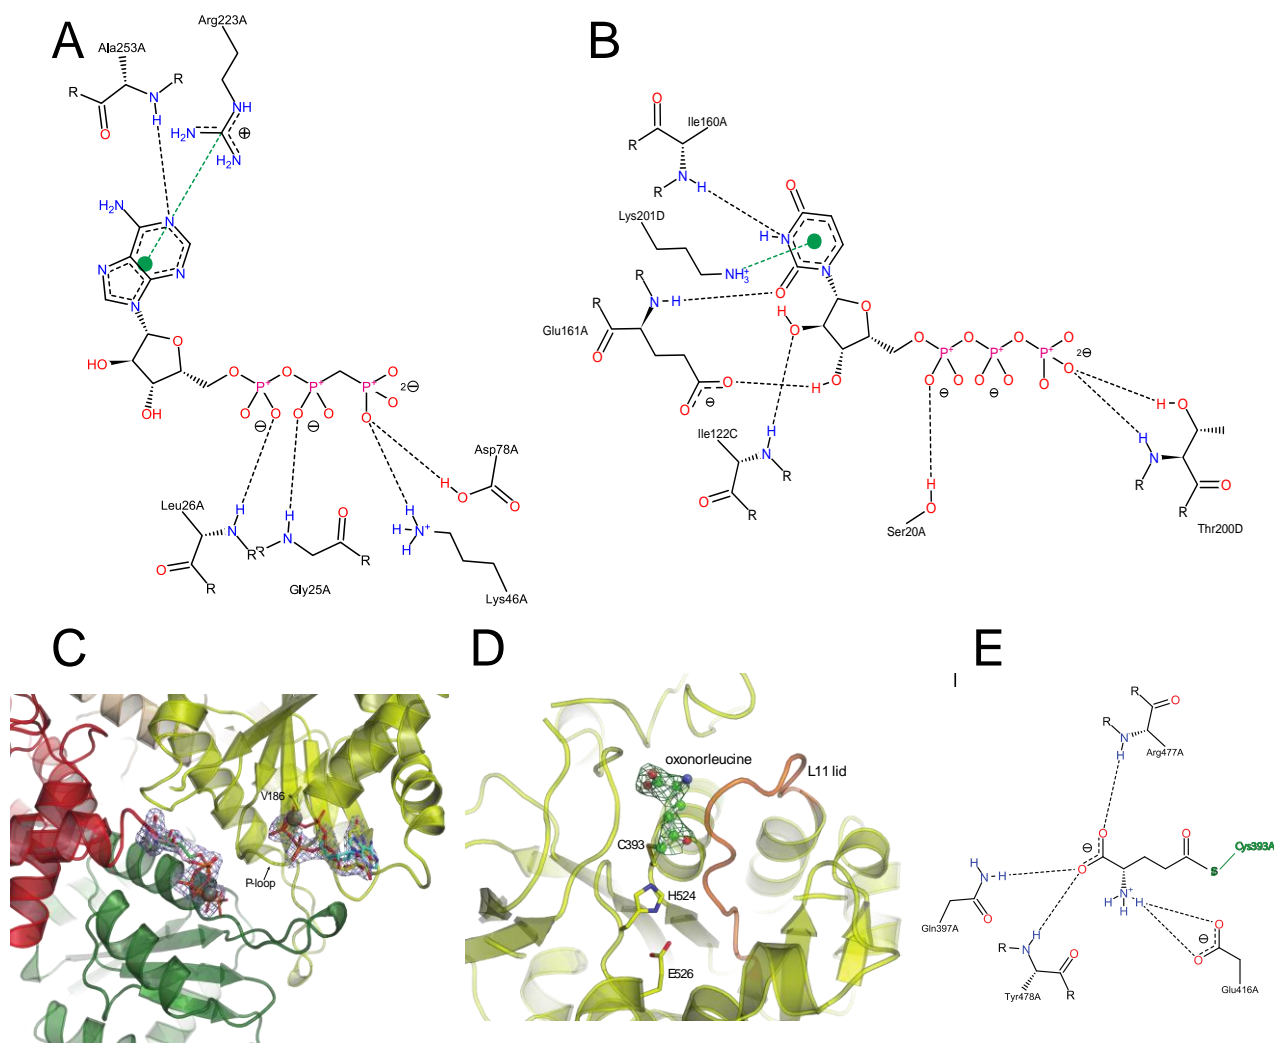

**Figure S4, related to Figure 4. Representation of PyrG in complex with different ligands.**

Bidimensional representation of ligand-enzyme interactions for AMP-PCP (A) and UTP (B). UTP occupies the CTP-binding pocket, similarly to the *E. coli* PyrG with CTP and ADP (PDB: 2ad5; Endrizzi et al., 2005). Figure is realized with Poseview server (<http://poseview.zbh.uni-hamburg.de/>; Stierand and Rarey, 2010).

(C) Cartoon view of the active site of *M. tuberculosis* PyrG in complex with UTP, showing two UTP molecules occupying the CTP and the ATP-binding pocket. The carbons of CTP binding site are in green (left), while the carbons of the ATP-binding pocket in yellow (right). Gray spheres represent  $Mg^{2+}$ . The corresponding  $2F_o - F_c$  electron density map, contoured at the  $1\sigma$  level, is shown as a blue mesh. The lateral chain of Val186, mutated to Gly in the *M. tuberculosis* strain resistant to 7947882, is shown as sticks. Colors refer to the different protomers within the PyrG functional tetramer. Superimposed, and shown as sticks, are the CTP and ADP ligands in complex with *E. coli* PyrG (PDB: 2ad5), representing a CTP-inhibited enzyme (Endrizzi et al., 2005). Coordinates of the two orthologous enzymes superimpose with an rmsd=1.18 Å but, for clarity, only the ligands from 2ad5 following the superimposition are shown.

(D) View of the glutaminase active site in the C-terminal domain of PyrG with UTP (not shown) and 5-oxo-L-norleucine (after 30' soak with 25 mM). The figure represents the catalytic triad (Cys393-His524-Glu526) involved in glutamine hydrolysis in class I amidotransferases (Hart and Powers-Lee, 2008; Zalkin and Smith, 1998), and the key nucleophile Cys393 in alkylated form with 5-oxo-L-norleucine after the reaction with L-DON, which mimics the tetrahedral enzyme-Gln reaction intermediate. The green mesh represents Fourier difference  $F_o - F_c$  electron density before the covalently-bound ligand was modeled. In orange, the 'L11 lid' including  $\beta$ 14 and the loop that connects it to  $\alpha$ 14 (residues Val361 to Glu373 in PyrG; Fig. S5), proposed to fold over the Gln substrate in the glutaminase active site (Endrizzi et al., 2004).

(E) 2D depiction of the oxonorleucine interactions in the GATase active site, realized with the Poseview server.

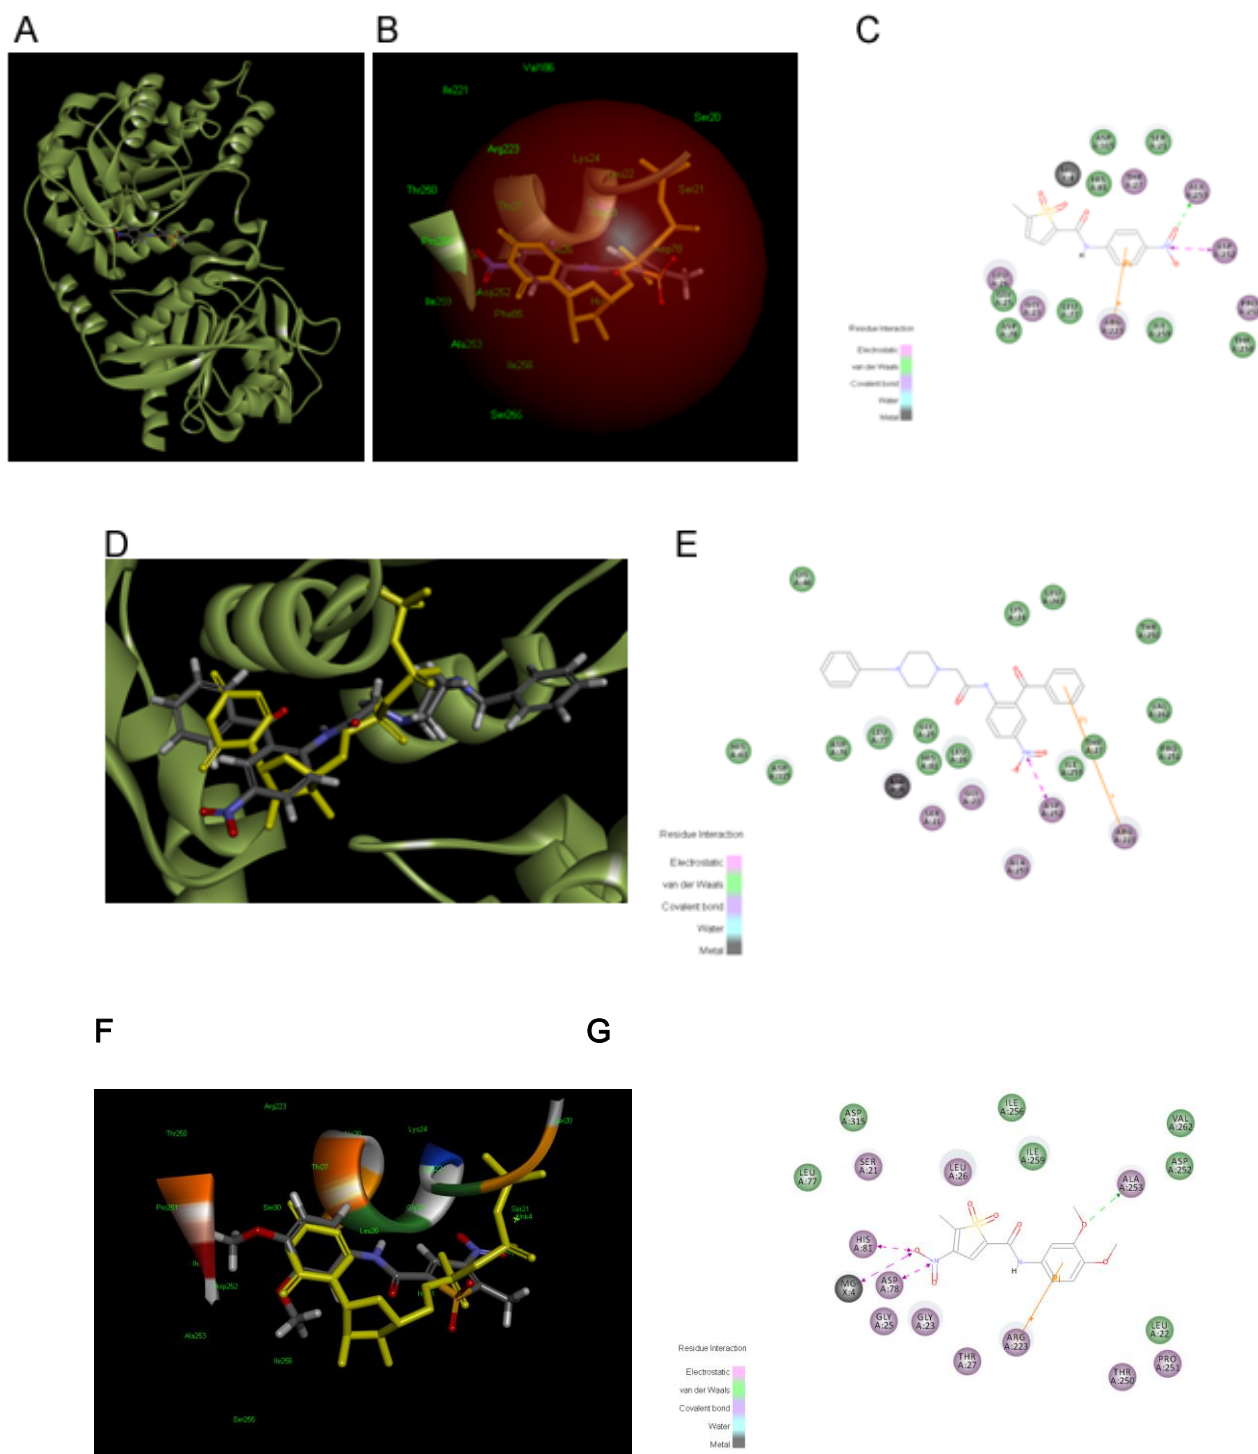

**Figure S5, related to Figure 4. Docking of PyrG inhibitors.**

(A) 11426026 docked in the PyrG ATP binding site.

(B) Overlap of 11426026 (colored by atom) and the UTP structure (yellow).

(C) 2D interaction map for 11426026.

(D) CDD-823953 docked in the ATP binding site (colored by atom) and the UTP structure (yellow).

(E) 2D interaction map for CDD-823953.

(F) Overlap of the 11326054 sulfone and the UTP structure.

(G) 2D interaction map for 11326054 sulfone.

## SUPPLEMENTARY TABLES

### List of oligonucleotide primers used in this study, related to Experimental Procedures.

| Primers                                        | Sequence (5'-3')                                                                                                 | PCR product (bp)                                                                 | Purpose                                                                |
|------------------------------------------------|------------------------------------------------------------------------------------------------------------------|----------------------------------------------------------------------------------|------------------------------------------------------------------------|
| <b>PyrGseqF</b><br>or<br><b>PyrGseqR</b><br>ev | AAATCGGGGGCACTGTGC<br>CCTTGGGTATGTCGTAGAT                                                                        | 330                                                                              | Sequencing of <i>pyrG</i>                                              |
| <b>EthAseqF</b><br>or<br><b>EthAseqR</b><br>ev | TGGCAGCTTACTACGTGTC<br>CTGGGCGGGGTGACATTC                                                                        | 1647                                                                             | Sequencing of <i>ethA</i>                                              |
| <b>EthAsodF</b><br>or<br><b>EthAsodR</b><br>ev | TT <del>ggatcc</del> ATGACCGAGCACCTC ( <i>Bam</i> HI)<br>TT <del>aagctt</del> CTAAACCCCCACCGG ( <i>Hind</i> III) | 1470                                                                             | Cloning of <i>ethA</i> in pSODIT-2                                     |
| <b>EthAsumF</b><br>or<br><b>EthAsum</b><br>Rev | ATGACCGAGCACCTCG<br>CTAAACCCCCACCGG                                                                              | 1470                                                                             | Cloning of <i>ethA</i> from <i>M.tuberculosis</i> into pET-SUMO vector |
| <b>RP1609</b>                                  | TTTTatgcatCGAAAGCACCCGCAAACC<br>( <i>Nsi</i> I)                                                                  | 714                                                                              | Construction of <i>pyrG</i> knock-down mutant                          |
| <b>RP1610</b>                                  | TTTTactagtCATCAACGCAATCTTGTTTTTCA<br>( <i>Spe</i> I)                                                             |                                                                                  |                                                                        |
| <b>MB319</b>                                   | ATCAAGGATCCGAGAATCTTTATTTTCAAGGA <del>aagcggcgcgat</del> gcgaaa<br>gcaccgcaaaccgc<br>( <i>Bam</i> HI)            | Cloning of <i>pyrG</i> in pET-28a (N-terminal TEV cleavage site plus SGA spacer) |                                                                        |
| <b>MB297</b>                                   | TTTACAAGCTTcagccagagacgcaggttcc<br>( <i>Bam</i> HI)                                                              |                                                                                  |                                                                        |
| <b>MB298</b>                                   | CTGCACG <del>g</del> GTCGCTGGTGCCCTACCTGGCGCC                                                                    |                                                                                  |                                                                        |
| <b>MB299</b>                                   | CCAGCGAC <del>c</del> CGTGCAGAAAAACACGTCCTCC                                                                     | Generation of the <i>pyrG</i> mutant coding for Val186 (instead of Gly)          |                                                                        |

**Table S1, related to Table 2. Profile of resistance of *M. tuberculosis* strain overexpressing *ethA*.**

|                     | MIC ( $\mu\text{g/ml}$ ) in <i>M. tuberculosis</i> strains |         |              |
|---------------------|------------------------------------------------------------|---------|--------------|
|                     | H37Rv                                                      |         | 82.14 mutant |
|                     | 7904688                                                    | 7947882 | 7947882      |
| pSODIT-2            | 1                                                          | 0.5     | > 10         |
| pSODIT/ <i>ethA</i> | 0.25-0.5                                                   | < 0.06  | 0.125        |

**Table S2, related to Figure 1. MIC values of *M. tuberculosis ethA* and *pyrG* mutants to 11426026.**

| Compounds | Structure                                                                           | MIC ( $\mu\text{g/ml}$ ) in <i>M. tuberculosis</i> |                            |                           |
|-----------|-------------------------------------------------------------------------------------|----------------------------------------------------|----------------------------|---------------------------|
|           |                                                                                     | H37Rv                                              | <i>ethA</i> mutant (81.10) | <i>pyrG</i> mutant (88.7) |
| 11426026  | 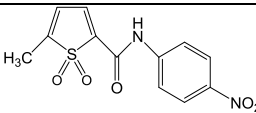  | 1                                                  | 1                          | 2.5                       |
| 7947882   |  | 0.5                                                | >40                        | 5-10                      |

**Table S3, related to Figure 3. Crystallographic data collection and refinement statistics. Values relative to the highest resolution shell are within parentheses.**

|                                                         | <b>PyrG<br/>apo enzyme</b>    | <b>PyrG in complex<br/>with two<br/>molecules of UTP</b> | <b>PyrG in complex<br/>with<br/>UTP/L-DON/AMP-PCP</b> |
|---------------------------------------------------------|-------------------------------|----------------------------------------------------------|-------------------------------------------------------|
| <b>Data collection</b>                                  |                               |                                                          |                                                       |
| Wavelength (Å)                                          | 0.9801                        | 0.9801                                                   | 0.9150                                                |
| Space group                                             | P4 <sub>3</sub>               | I222                                                     | I2 <sub>1</sub> 2 <sub>1</sub> 2 <sub>1</sub>         |
| Cell dimensions <i>a</i> , <i>b</i> , <i>c</i> (Å)      | 196.83, 196.83, 184.04        | 79.41, 132.73, 157.64                                    | 121.73, 194.72, 207.46                                |
| □□□□ <i>α</i> , <i>β</i> , <i>γ</i> (°)                 | 90.0, 90.0, 90.0              | 90.0, 90.0, 90.0                                         | 90.0, 90.0, 90.0                                      |
| Resolution (Å)                                          | 49.21 – 3.52<br>(3.58 – 3.52) | 48.86 – 1.99<br>(2.04 – 1.99)                            | 48.68 – 3.49<br>(3.67 – 3.49)                         |
| <i>R</i> <sub>merge</sub>                               | 0.137 (0.998)                 | 0.052 (0.717)                                            | 0.091 (1.128)                                         |
| <i>I</i> / <i>σ</i> ( <i>I</i> )                        | 8.6 (1.3)                     | 13.5 (1.7)                                               | 16.7 (2.1)                                            |
| CC(1/2) (%)                                             | 99.4 (61.3)                   | 99.9 (66.6)                                              | 99.9 (76.6)                                           |
| Unique reflections                                      | 85758                         | 56696                                                    | 31727                                                 |
| Completeness (%)                                        | 98.4 (92.1)                   | 99.2 (92.9)                                              | 99.6 (98.0)                                           |
| Redundancy                                              | 3.8 (3.7)                     | 3.7 (3.6)                                                | 8.8 (8.6)                                             |
| <b>Refinement</b>                                       |                               |                                                          |                                                       |
| Resolution (Å)                                          | 3.52                          | 1.99                                                     | 3.49                                                  |
| No. reflections*                                        | 81332                         | 53800                                                    | 30084                                                 |
| <i>R</i> <sub>work</sub> / <i>R</i> <sub>free</sub> (%) | 21.3/22.1                     | 16.7/18.9                                                | 20.3/21.3                                             |
| Average B-factors (Å <sup>2</sup> )                     |                               |                                                          |                                                       |
| Macromolecule                                           | 111.00                        | 40.62                                                    | 143.57                                                |
| Solvent                                                 | -                             | 45.88                                                    | -                                                     |
| R.m.s deviations                                        |                               |                                                          |                                                       |
| Bond lengths (Å)                                        | 0.008                         | 0.010                                                    | 0.008                                                 |
| Bond angles (°)                                         | 0.89                          | 0.97                                                     | 1.01                                                  |
| <b>PDB #</b>                                            | 4ZDI                          | 4ZDJ                                                     | 4ZDK                                                  |

\* Excluding the *R*<sub>free</sub> set (5% of total reflections)

**Table S4 related to Figure 5. MIC values of 7947882 derivatives. (A) Derivatives in which the thiophene moiety was substituted with a furan, a pyrazole, or a methyl thiazole moiety. (B) Derivatives in which the nitroalanine moiety was substituted. (C) Derivatives lacking the methyl in position 5 of the thiophene moiety. (D) Derivatives with a methylation in position 4 of the thiophene moiety. (E) Derivatives carrying a nitro group in position 4 of the thiophene moiety. (F) Carboxyl derivatives. (Excel File)**

| <b>Table S5, related to Figure 5. Biological and biochemical characterization of 11426026 derivatives.</b> |                                                                                     |                                                        |                                   |                                                                                               |                                                                                                  |
|------------------------------------------------------------------------------------------------------------|-------------------------------------------------------------------------------------|--------------------------------------------------------|-----------------------------------|-----------------------------------------------------------------------------------------------|--------------------------------------------------------------------------------------------------|
| <b>compound</b>                                                                                            | <b>structure</b>                                                                    | <b>H37Rv<br/>MIC<br/>(<math>\mu\text{g/ml}</math>)</b> | <b>Ki (mM)<br/>PyrG wild type</b> | <b><sup>a</sup>% of<br/>inhibition at<br/>200 <math>\mu\text{M}</math><br/>PyrG wild-type</b> | <b><sup>a</sup>% of inhibition<br/>at 200 <math>\mu\text{M}</math><br/>PyrG V186G<br/>mutant</b> |
| <b>11426026</b>                                                                                            | 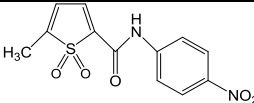   | 1                                                      | $0.010 \pm 0.002$                 | $83.6 \pm 3.8$                                                                                | $18.3 \pm 1.5$                                                                                   |
| <b>11426169</b>                                                                                            |    | 2.5                                                    | $0.016 \pm 0.004$                 | $84.8 \pm 2.9$                                                                                | $20.6 \pm 1.2$                                                                                   |
| <b>11426170</b>                                                                                            |    | >20                                                    | $0.032 \pm 0.003$                 | $80.5 \pm 1.7$                                                                                | $9.5 \pm 3.5$                                                                                    |
| <b>11426171</b>                                                                                            |    | 10                                                     | not determined                    | $45.0 \pm 3.2$                                                                                | $4.3 \pm 1.9$                                                                                    |
| <b>11426172</b>                                                                                            |    | 2.5                                                    | $0.023 \pm 0.004$                 | $83.4 \pm 2.0$                                                                                | $13.5 \pm 1.9$                                                                                   |
| <b>11426173</b>                                                                                            |   | >5                                                     | $0.044 \pm 0.003$                 | $77.3 \pm 2.1$                                                                                | $14.1 \pm 2.8$                                                                                   |
| <b>11426174</b>                                                                                            |  | 20                                                     | not inhibitory                    | not inhibitory                                                                                | not inhibitory                                                                                   |

<sup>a</sup>determined at a concentration of ATP equal to the  $K_m$  value (0.2 mM and 1.5 mM for the wild type and the mutant, respectively)

## SUPPLEMENTAL EXPERIMENTAL PROCEDURES

### **Bacterial strains and growth conditions.**

Cloning steps were performed in *Escherichia coli* XL1-Blue, following standard methods (Sambrook and Russel, 2001). For expression studies, the *E. coli* strains utilized were: One Shot® Mach1™-T1R (Invitrogen), and BL21(DE3).

*E. coli* cultures were grown either in Luria-Bertani (LB) broth or on LB agar. When necessary, antibiotics were added at the following concentrations: ampicillin, 100 µg/ml; hygromycin, 200µg/ml (20 µg/ml for *M. tuberculosis*); and kanamycin, 50 µg/ml.

Both 7947882 [5-methyl-N-(4-nitrophenyl)-2-thiophenecarboxamide] and 7904688 [3-phenyl-N-({[4-(1-piperidinyl)phenyl]-amino} carbonothioyl) propanamide] compounds were dissolved in dimethyl sulfoxide (DMSO) (<http://www.chembridge.com/index.php>).

*M. tuberculosis* strains were grown aerobically at 37°C either in Middlebrook 7H9 medium or on Middlebrook 7H11 agar, both supplemented with 10% OADC Middlebrook Enrichment.

### **Library screening**

Compounds from a selected library from NIAID were initially screened at 10 µg/ml in duplicate for activity against H37Rv and ss18b model in 96-well format using the resazurin reduction assay (REMA). Briefly, compounds (1 µl of 10mg/ml in DMSO) were added to the wells of a 96 well plate. Column 1 served as a negative control (DMSO), and column 12 served as a positive control (final concentration of rifampicin:0.1 µg/ml for H37Rv or 2 µg/ml for ss18b). For the H37Rv plates, frozen aliquots diluted into Middlebrook 7H9 (supplemented with 10% ADC, 0.2% glycerol, 0.05% tween 80) to an OD<sub>600 nm</sub> of 0.0001 (100 µl) were added to each well. For the ss18b plates, frozen aliquots of ss18b (Sala et al., 2010) diluted into 7H9 to an OD<sub>600 nm</sub> of 0.1 (100 µl) were added to each well. Following 1 week incubation (37°C), bacterial viability was determined using the resazurine reduction assay (add 10 µl of 0.025% resazurin). Following an overnight incubation,



the fluorescence of the resazurin metabolite resorufin was determined (excitation at 560 nm and emission at 590 nm; gain, 80) by using a Tecan Infinite M200 microplate reader.

The cytotoxicity of the compounds was determined on human hepatocellular carcinoma cell line HepG2 and Huh7, human lung epithelial cell line; A549 and murine macrophage cell line; RAW 264.7. Briefly, serial dilutions of the compounds were added to the well of a 96 well plate (1 in 2 dilutions, from 40 to 0.08  $\mu\text{g/ml}$  final concentration), column 1 served as negative control and column 12 as positive control (no cells added). Subsequently, 100  $\mu\text{l}$  of the cell lines was seeded into the 96 well plates ( $5 \times 10^3$  cells per well, in DMEM containing 10% Fetal Bovine Serum (HepG2, Huh7 and A549), or RPMI containing 10% Fetal Bovine Serum (Raw264.7)). Plates were incubated for 3 days ( $37^\circ\text{C}$  with 5%  $\text{CO}_2$ ) and viability determined using resazurin. Plates were incubated for 2 more hours and cell viability was determined by fluorescence (excitation 570 nm, emission 590 nm).

### **MIC determinations.**

A single colony of each *M. tuberculosis* strain was inoculated in complete Middlebrook 7H9. Cell cultures were grown at  $37^\circ\text{C}$  until exponential growth phase ( $\sim 10^8$  CFU/ml) was reached.

Dilutions to the final concentration of  $\sim 10^6$  CFU/ml were performed and about 1  $\mu\text{l}$  of cell culture was streaked onto plates containing two-fold serial dilutions of appropriate compound. MIC values were assigned as the lowest drug concentrations inhibiting bacterial growth. All experiments were repeated three times.

### **Infection of THP-1-derived macrophages.**

THP-1 monocytes (American Type Culture Collection) were grown in suspension at  $37^\circ\text{C}$  in 5%  $\text{CO}_2$  in bicarbonate-buffered RPMI (Gibco) supplemented with 10% (vol/vol) fetal bovine serum (FBS; Gibco), 50  $\mu\text{mol/liter}$   $\beta$ -mercaptoethanol to a density of about  $0.5 \times 10^6$  cells/ml. Differentiation of monocytes into macrophages was obtained by plating the cells in 96-well plates at

a density of about  $7.5 \times 10^4$  cells/well in the presence of 50 ng/ml phorbol 12-myristate 13-acetate (PMA; Sigma-Aldrich). After 24 h, PMA was removed and cells were infected with *M. tuberculosis* pyrG conditional mutant and its control strain at a multiplicity of infection of 1:20 (number of CFU/cell) for 90 min (Manganelli et al., 2001). After infection, extracellular bacteria were removed by washing with phosphate-buffered saline (PBS) and fresh RPMI medium with or without ATc (200 ng/ml). The medium was replaced every 48 h. At different time points, macrophages were lysed with SDS (0.05%). The lysate containing the bacteria was diluted in fresh medium and plated to determine the viable counts (Manganelli et al., 2001).

### **Expression and purification of *M. tuberculosis* EthA.**

The *ethA* gene from *M. tuberculosis* H37Rv was amplified by standard PCR. The PCR fragment was cloned in the T7 promoter-based expression vector pET-SUMO, generating pET-SUMO/*ethA*. One or more *E. coli* fresh colonies carrying pET SUMO/*ethA* recombinant plasmid were used to transform *E. coli* BL21(DE3) One Shot® cells, that were plated onto LB agar plates containing 50 µg/ml kanamycin. For each transformation, a single colony overnight pre-inoculum, grown at 37°C in the presence of 50 µg/ml kanamycin, was diluted 1:50 in 6 liters of the same medium. The culture was then incubated at 37°C until OD<sub>600nm</sub> 0.6-0.8 was reached; therefore, isopropyl-β-thiogalactopyranoside (IPTG) was added at final concentration of 0.5mM, and the incubation was continued for 3h. Cells were harvested by centrifugation, resuspended in 50 mM sodium phosphate pH 8.0, 300 mM NaCl, 1% triton-X100, and disrupted by sonication. The cell-free extract was obtained by centrifuging at 30,000g for 45 minutes at 4°C and applied onto a nickel affinity column (1 ml, Ni-NTA, Qiagen), washed with 100 mM imidazole and the protein eluted with 250 mM imidazole. Tag cleavage was achieved by overnight incubation with 0.3 mg of SUMO protease dialyzed against 50 mM sodium phosphate pH 8.0, followed by a second Ni-NTA purification step to remove both tag and SUMO protease. Samples purity was checked by SDS-PAGE and proteins concentration evaluated by absorbance at 280 nm ( $\epsilon=97290 \text{ M}^{-1} \text{ cm}^{-1}$ ).

### **Expression and purification of *M. tuberculosis* PyrG.**

The *PyrG* gene from *M. tuberculosis* H37Rv was amplified by standard PCR. The PCR fragment was cloned in the pET28a plasmid, generating pET28a/*PyrG*. *M. tuberculosis* PyrG wild type recombinant protein was obtained fused with a His<sub>6</sub> tag in *E. coli* BL21(DE3) cells grown in LB medium containing 50 µg/ml kanamycin at 25°C for 12 hours, after induction with 0.5 mM IPTG. For all enzymatic assays, the protein was purified through a nickel affinity column in 50 mM sodium phosphate pH 8.0, 300 mM NaCl, washed with 25 mM imidazole, eluted with 250 mM imidazole in the same buffer and further dialyzed in 50 mM potassium phosphate pH 7.5, 50 mM KCl. For structural studies, PyrG was similarly purified through a first IMAC step on a HisTrap column (GE Healthcare) in 50 mM Tris-HCl pH 8.0, 500 mM NaCl, 25 mM imidazole, 5% glycerol and eluted applying a 25 to 400 mM imidazole gradient in the same buffer. The purified enzyme was then dialyzed in 25 mM Hepes pH 8.0, 150 mM NaCl, 5% glycerol, 1 mM DTT after adding recombinant TEV (Van Den Berg et al., 2006) to a 1:30 w/w ratio. The dialyzed sample was further purified from the protease and the cleaved tag by a second, gravity flow step through 1.0 ml of Ni-NTA resin (Qiagen), concentrated and injected onto a HiLoad 26/60 Superdex 200 size exclusion column (GE Healthcare), equilibrated in 25 mM Hepes-Na pH 8.0, 150 mM NaCl, 5% glycerol and run at 1 ml/min.

Samples purity was checked by SDS-PAGE and proteins concentration evaluated by absorbance at 280 nm ( $\epsilon=40715 \text{ M}^{-1} \text{ cm}^{-1}$ ).

The PyrG resistant mutant (V186G) protein was obtained by site-directed mutagenesis on the corresponding plasmid, using the QuikChange procedure (Agilent) and primers designed to include the desired mutation. The mutant enzyme was expressed and purified as described for the wild-type (see above).

### **Enzymatic activity assays, steady state kinetics and inhibition assays.**

EthA enzyme activity towards compounds was determined spectrophotometrically by monitoring the decrease of NADPH at 340 nm ( $\epsilon = 6.22 \text{ mM}^{-1} \text{ cm}^{-1}$ ) at 37°C as previously reported (Fraaije et al, 2004), using an Eppendorf BioSpectrometer. Reaction mixtures typically contained 50 mM potassium phosphate pH 8.0, 0.2 mM NADPH, 10  $\mu\text{M}$  serum bovine albumin (BSA), 50  $\mu\text{M}$  of compound (dissolved in dimethylformamide), and the reaction was started by adding the enzyme solution (1  $\mu\text{M}$ ).

PyrG activity was determined at 37°C using a continuous spectrophotometric assay following the rate of increase in absorbance at 291 nm due to the conversion of UTP to CTP ( $\epsilon = 1.34 \text{ mM}^{-1} \text{ cm}^{-1}$ ) (Lunn et al., 2008). Assays were performed at 37°C in 50 mM HEPES pH 8.0, 10 mM  $\text{MgCl}_2$ , 1 mM UTP, 1 mM ATP, 0.5  $\mu\text{M}$  PyrG, and the reaction was started by the addition of 100 mM  $\text{NH}_4\text{Cl}$ .

Steady-state kinetics parameters were determined by assaying the enzymes at least at 8 different concentrations of their substrates. All experiments were performed in triplicate, and the kinetic constants,  $K_m$  and  $k_{cat}$ , were determined fitting the data to the Michaelis-Menten equation using Origin 8 software.

PyrG inhibition was initially screened for all compounds at 200  $\mu\text{M}$  (dissolved in DMSO). For compounds that significantly inhibited the enzyme activity in these conditions,  $\text{IC}_{50}$  and  $K_i$  values were determined. For  $\text{IC}_{50}$  determinations, the enzyme activities were measured in presence of a serial dilution of each compound and values were estimated by fitting  $\log[I]$  and normalized in response to Equation 1. The  $K_i$  values were determined using an adapted equation for competitive inhibition (Equation 2) (Copeland, 2000).

$$V = \frac{100}{\{1 + 10^{(\log(\text{IC}_{50} - [I]) \times h)}\}} \quad \text{equation 1}$$

$$v = \frac{V_{\max}[S]}{[S] + K_m \left(1 + \frac{[I]}{K_i}\right)} \quad \text{equation 2}$$

### ***In vitro* EthA metabolites production and identification.**

For *in vitro* EthA metabolite production, 30 mg of 7947882 were incubated with 10 mg of EthA in 50 mM potassium phosphate pH 8.0, 500  $\mu$ M NADPH, 10  $\mu$ M BSA, at 37°C, 5 h under agitation. The reaction mixture was then partitioned between water and diethyl ether, the aqueous layer was extracted with diethyl ether, and combined organic layer washed with brine and dried over Na<sub>2</sub>SO<sub>4</sub>. Solvent was removed under reduced pressure and the residue was purified by flash column chromatography (Merck SiO<sub>2</sub> 60, 230–400 mesh). Elution was performed with hexane-ethyl acetate ratio 8:2. Visualization of reaction components was achieved under UV light at a wavelength of 254 nm, or staining by exposure to a 0.5% solution of vanillin in H<sub>2</sub>SO<sub>4</sub>/EtOH. Mass spectra were recorded in negative ESI resolution mode with a Thermo LTQ-XL mass spectrometer.

### ***In vitro* production of the PyrG-7947882 metabolite complex.**

In order to obtain the PyrG complexed with the EthA activated metabolite of 7947882 or of 7904688, the enzyme was incubated with each compound in the presence of the monooxygenase. Briefly, PyrG (45  $\mu$ M) was incubated with EthA (10  $\mu$ M) in 50 mM potassium phosphate buffer pH 8.0, 300  $\mu$ M NADPH, 300  $\mu$ M 7947882 or 7904688, at 37°C. For the blank control NADPH was omitted from the reaction mixture, in order to avoid prodrug activation. At regular intervals, aliquots were withdrawn and PyrG activity was measured, to determine the enzyme inhibition. The activity measurements were performed as described, but with a final concentration of ATP of 0.2 mM.

After 4 hours of incubation, the reaction mixture was loaded on a Ni-NTA column equilibrated in 50 mM potassium phosphate pH 7.5, 50 mM KCl and washed with the same buffer to elute EthA, unbound 7947882 (or 7904688) and metabolite(s). PyrG was then eluted with 100 mM imidazole in

the same buffer, dialyzed against 25 mM potassium phosphate pH 7.5, 50 mM KCl and concentrated.

### **Metabolomics Experiments**

For liquid chromatography-mass spectrometry analysis of polar metabolites, the samples were diluted 1:1 with acetonitrile containing 0.2% acetic acid. After centrifugation at 13000g for 10 minutes the samples were applied on a Cogent Diamond Hydride Type C silica column (150 mm × 2.1 mm; dead volume 315 µl) using an Agilent 1200 LC system. The flow rate was 0.4 ml/min. The gradient is based on the number 3 (Pesek et al., 2008). An Agilent Accurate Mass 6230 TOF apparatus was employed. Dynamic mass axis calibration was achieved by continuous infusion of a reference mass solution using an isocratic pump connected to a multimode ionization source, operated in the positive-ion and negative-ion mode. ESI capillary and fragmentor voltages were set at 3500 V and 100 V, respectively. The nebulizer pressure was set at 40 psi and the nitrogen drying gas flow rate was set at 10 l/min. The drying gas temperature was maintained at 250°C. The MS acquisition rate was 1.5 spectra/sec and m/z data ranging from 50-1200 were stored. Data were collected in the centroid mode in the 4 GHz (extended dynamic range) mode. Detected m/z were deemed to identify metabolites on the basis of unique accurate mass-retention time identifiers for masses, exhibiting the expected distribution of accompanying isotopomers. Data were analyzed with the Qualitative Analysis software v. B.04.00. Heat map was generated using Heatmap Builder® V. 11 (King et al., 2005).

For TLC analysis of radiolabeled nucleotide extract, 1000-3000 dpm were removed from the formic acid extract, which was evaporated under vacuum. The sample was re-dissolved in 5 µl of water and loaded on PEI Cellulose F plate (Millipore). After drying of the sample, the TLC plate was soaked for 20 min in methanol, dried on air and developed in 0.75 M KH<sub>2</sub>PO<sub>4</sub>, pH adjusted to 3.5 with 0.75 M H<sub>3</sub>PO<sub>4</sub> (Bochner and Ames, 1982). The radioactive spots were visualized by exposing the TLC

plate to BioMax MR autoradiography film at -80°C. 10 nmols of cold standards (UTP, UDP, UMP, CTP, CDP, CMP, UDP-Gal, UDP-GlcNAc; Sigma-Aldrich) were loaded on the TLC plate and located by UV ( $\lambda=254$  nm).

For HPLC analysis of radiolabeled nucleotide extract, aliquots of formic acid extracts corresponding to 4000 dpm (GAS) or 7000 dpm (7H9) were evaporated under vacuum. These samples were then re-dissolved in 20  $\mu$ l of water and combined with 3  $\mu$ l of the cold standards mixture [UTP, UDP, UMP, CTP, CDP, CMP, UDP-Gal, UDP-GlcNAc, UDP-MurNAc-pentapeptide (the latter from BaCWAN Synthetic Facility, University of Warwick)]. 20  $\mu$ l of this sample was separated on BioBasic AX anion exchange HPLC column (Singh et al., 2015). Radioactivity was determined by scintillation spectrometry using 5 ml of EcoLite scintillation liquid.

### **Docking and cheminformatics.**

The protein was prepared for docking using the default settings of the ‘prepare protein’ protocol in Discovery Study 4.1 (Biovia, San Diego, CA). The protein was used for docking using LibDock (Rao et al., 2007). The proposed binding sites (ATP and UTP) were centered on the UTP molecules. The coordinates for the ATP site was X = 8.71, Y = 24.72, Z = 66.82 (sphere radius 9.19Å), while for the UTP site was X = 11.65, Y = 65.49, Z = 8.54, (sphere radius 8.54Å). The protocol included 100 hotspots and docking tolerance (0.25). The FAST conformation method was also used along with steepest descent minimization with CHARMM. The 11426026 structure was initially docked in both sites.

A substructure of 11426026 (4-Nitroacetanilide) was used to search for a set of *M. tuberculosis* active compounds (Ananthan et al., 2009; Ekins et al., 2014; Maddry et al., 2009; Reynolds et al., 2012) collected in the Collaborative Drug Discovery Database (www.collaborativedrug.com, Burlingame, CA; Ekins and Bunin, 2013). Twelve compounds were retrieved and docked in the

PyrG ATP site. Molecules were visualized, and their 2D interaction plots generated and selected for follow-up.

### **Synthesis of thiophene derivatives.**

Visualization of reaction components was achieved under UV light at a wavelength of 254 nm.  $^1\text{H}$  and  $^{13}\text{C}$  NMR spectra were recorded in Bruker AC-300. Chemical shifts are given in ppm and are referenced by using the residual signals of the solvent as internal standard. Mass spectra were recorded with a Waters ZQ-2000 mass spectrometer.

**5-Acetylthiophene-2-carboxylic acid (11326027), 5-methylthiophene-2-carboxylic acid (11326028), 5-methyl-4-nitrothiophene-2-carboxylic acid (11326034), 5-methylthiophene-2-carboxamide (11226085), thiophene-2-carboxylic acid (11326226), 5-methyl-2-furoic acid (11326227), 3-methylthiophene-2-carboxylic acid (11326228), 4-methyl-1,3-thiazole-5-carboxylic acid (11326229), 4-methylthiophene-2-carboxylic acid (11326230), 1-ethyl-3-methyl-1H-pyrazole-5-carboxylic acid (11326231)** were purchased from Sigma-Aldrich Co (USA) and used after one recrystallisation from suitable solvent.

*Synthesis of thiophene derivatives-* Solution of thiophene-2-carboxylic acid in  $\text{CCl}_4$  was treated with thionyl chloride and one drop of DMF was added. The reaction mixture was refluxed for 2 hours and evaporated under vacuum and residue was used in the next step without additional purification. Solution of chlor anhydride from previous step in  $\text{CH}_3\text{CN}$  was treated by 2 mol of corresponding amine at room temperature, reaction mixture was stored for 4 hours, diluted by cold water and precipitate was filtered off. Thiophene-2-carboxamide was purified by the crystallization from ethanol.

Water hydrogen peroxide was added by drop to trifluoroacetic acid and stored for 1 hour at room temperature. Thiophene-2-carboxamide was added to this mixture, it was heated to  $70\text{ }^\circ\text{C}$  for 24 hours, diluted by cold water and precipitate was filtered off. Thiophene-2-carboxamide 1,1-dioxide was purified by the crystallization from ethanol.



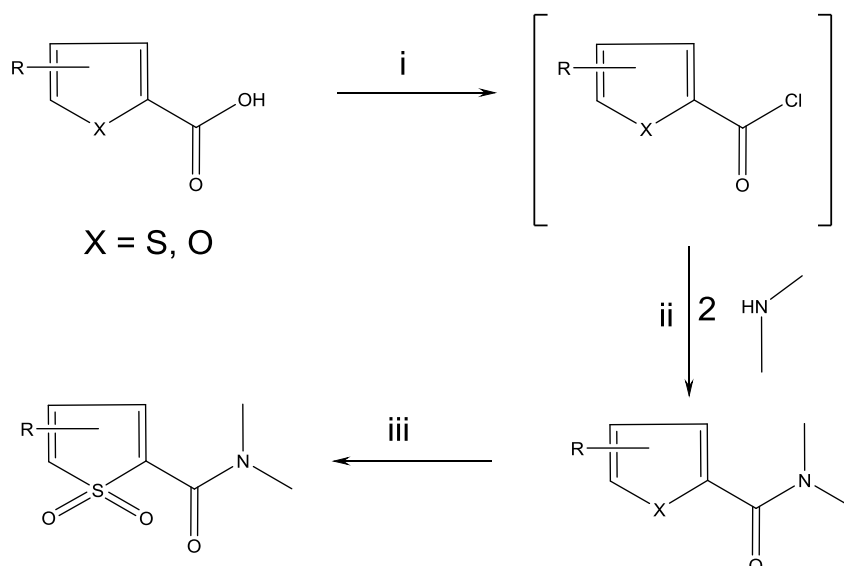

**Scheme 1.** Reagents and conditions: (i)  $\text{SOCl}_2$ , DMF,  $\text{CCl}_4$ , reflux, 2 h, 100%; (ii)  $\text{CH}_3\text{CN}$ , 20 °C, 4 h; (iii)  $\text{H}_2\text{O}_2$   $\text{H}_2\text{O}$ ,  $\text{CF}_3\text{COOH}$ , 70 °C.

### Analytical data of thiophene derivatives

**5-Acetyl-N-(4-nitrophenyl)thiophene-2-carboxamide (11226089):** Yield 42%, M.p. 143-6 °C,  $^1\text{H}$  NMR (300 MHz, DMSO- $d_6$ ): 9.39 (br s, 1H), 8.22 (d, 2H,  $J = 9.6$  Hz), 7.77 (d, 2H,  $J = 9.6$  Hz), 7.44 (d, 1H,  $J = 3.7$  Hz), 6.86 (d, 1H,  $J = 3.7$  Hz), 2.74 (s, 3H); LCMS (ESI):  $m/z$  291.3 ( $\text{M}+\text{H}$ ) $^+$ .

**N-(3,5-Dichlorobenzyl)-N,5-dimethylthiophene-2-carboxamide (11326001):** Yield 69%, M.p. 73-5 °C,  $^1\text{H}$  NMR (300 MHz, DMSO- $d_6$ ): 7.41 (s, 1H), 7.29 (d, 1H,  $J = 3.7$  Hz), 7.01 (d, 1H,  $J = 3.7$  Hz), 4.45 (s, 2H), 2.93 (s, 3H), 2.44 (s, 3H); LCMS (ESI):  $m/z$  315.2 ( $\text{M}+\text{H}$ ) $^+$ .

**N-(2,3-Difluorophenyl)-5-methylthiophene-2-carboxamide (11326002):** Yield 62%, M.p. 105-07 °C,  $^1\text{H}$  NMR (300 MHz, DMSO- $d_6$ ): 9.73 (br s, 1H), 7.59 (m, 1H), 7.39 (d, 1H,  $J = 3.7$  Hz), 6.99 (d, 1H,  $J = 3.7$  Hz), 6.58 (m, 2H), 2.43 (s, 3H); LCMS (ESI):  $m/z$  254.3 ( $\text{M}+\text{H}$ ) $^+$ .

**N-(2-Fluorophenyl)-5-methylthiophene-2-carboxamide (11326003):** Yield 66%, M.p. 130-32 °C,  $^1\text{H}$  NMR (300 MHz, DMSO- $d_6$ ): 9.47 (br s, 1H), 7.89 (m, 1H), 7.77 (m, 1H), 7.42 (d, 1H,  $J = 3.7$  Hz), 7.06 (m, 1H), 6.98 (d, 1H,  $J = 3.7$  Hz), 6.91 (m, 1H), 2.44 (s, 3H); LCMS (ESI):  $m/z$  236.3 ( $\text{M}+\text{H}$ ) $^+$ .

**5-Methyl-N-(3,4,5-trifluorophenyl)thiophene-2-carboxamide (11326005):** Yield 69%, M.p. 152-54 °C,  $^1\text{H}$  NMR (300 MHz, DMSO- $d_6$ ): 9.52 (br s, 1H), 7.49 (m, 2H), 7.41 (d, 1H,  $J = 3.7$  Hz), 6.91 (d, 1H,  $J = 3.7$  Hz), 2.41 (s, 3H); LCMS (ESI):  $m/z$  272.3 ( $\text{M}+\text{H}$ ) $^+$ .

***N*-(4-Fluorophenyl)-5-methylthiophene-2-carboxamide (11326006):** Yield 72%, M.p. 140-42 °C, <sup>1</sup>H NMR (300 MHz, DMSO-d<sub>6</sub>): 9.20 (br s, 1H), 7.66 (m, 2H), 7.44 (d, 1H, *J* = 3.7 Hz), 6.99 (m, 2H), 6.87 (d, 1H, *J* = 3.7 Hz), 2.44 (s, 3H); LCMS (ESI): *m/z* 236.3 (M+H)<sup>+</sup>.

**5-Methyl-*N*-[4-(trifluoromethoxy)phenyl]thiophene-2-carboxamide (11326007):** Yield 76%, M.p. 170-72 °C, <sup>1</sup>H NMR (300 MHz, DMSO-d<sub>6</sub>): 9.18 (br s, 1H), 7.83 (d, 2H, *J* = 6.9 Hz), 7.47 (d, 1H, *J* = 3.7 Hz), 7.29 (d, 2H, *J* = 6.9 Hz), 6.79 (d, 1H, *J* = 3.7 Hz), 2.40 (s, 3H); LCMS (ESI): *m/z* 302.3 (M+H)<sup>+</sup>.

***N*-(3,4-Dimethoxyphenyl)-5-methylthiophene-2-carboxamide (11326008):** Yield 59%, M.p. 146-48 °C, <sup>1</sup>H NMR (300 MHz, DMSO-d<sub>6</sub>): 10.21 (br s, 1H), 7.48 (d, 1H, *J* = 3.7 Hz), 7.43 (s, 3H), 7.10 (d, 2H, *J* = 9.2 Hz), 6.83 (d, 1H, *J* = 9.2 Hz), 6.74 (d, 2H, *J* = 3.7 Hz), 4.01 (s, 3H), 3.67 (s, 3H), 2.45 (s, 3H); LCMS (ESI): *m/z* 278.3 (M+H)<sup>+</sup>.

***N*,5-Dimethyl-*N*-(4-methylphenyl)thiophene-2-carboxamide (11326009):** Yield 59%, M.p. 146-48 °C, <sup>1</sup>H NMR (300 MHz, DMSO-d<sub>6</sub>): 7.40 (d, 1H, *J* = 3.7 Hz), 7.19 (m, 4H), 6.76 (d, 2H, *J* = 3.7 Hz), 3.65 (s, 3H), 2.44 (s, 3H), 2.35 (s, 3H); LCMS (ESI): *m/z* 246.3 (M+H)<sup>+</sup>.

***N*-[4-(Aminosulfonyl)phenyl]-5-methylthiophene-2-carboxamide (11326010):** Yield 69%, M.p. 80-2 °C, <sup>1</sup>H NMR (300 MHz, DMSO-d<sub>6</sub>): 9.64 (br s, 1H), 7.86 (br s, 2H), 7.82 (d, 2H, *J* = 7.2 Hz), 7.58 (d, 2H, *J* = 7.2 Hz), 7.47 (d, 1H, *J* = 3.7 Hz), 6.79 (d, 1H, *J* = 3.7 Hz), 2.42 (s, 3H); LCMS (ESI): *m/z* 297.4 (M+H)<sup>+</sup>.

***N*-[2-[4-(Aminosulfonyl)phenyl]ethyl]-5-methylthiophene-2-carboxamide (11326011):** Yield 54%, M.p. 212-14 °C, <sup>1</sup>H NMR (300 MHz, DMSO-d<sub>6</sub>): 7.81 (d, 2H, *J* = 7.2 Hz), 7.47 (d, 1H, *J* = 3.7 Hz), 7.30 (d, 2H, *J* = 7.2 Hz), 6.85 (d, 1H, *J* = 3.7 Hz), 6.10 (br s, 2H), 3.45 (t, 2H, *J* = 6.5 Hz), 2.87 (t, 2H, *J* = 6.5 Hz), 2.44 (s, 3H); LCMS (ESI): *m/z* 325.4 (M+H)<sup>+</sup>.

***N*-(3-Chlorobenzyl)-5-methylthiophene-2-carboxamide (11326012):** Yield 58%, M.p. 105-07 °C, <sup>1</sup>H NMR (300 MHz, DMSO-d<sub>6</sub>): 7.79 (s, 1H), 7.36 (d, 1H, *J* = 3.7 Hz), 7.26 (m, 2H), 7.18 (m, 1H), 7.10 (s, 1H), 7.08 (s, 1H), 6.91 (d, 1H, *J* = 3.7 Hz), 4.41 (d, 2H, *J* = 1.1 Hz), 2.42 (s, 3H); LCMS (ESI): *m/z* 266.8 (M+H)<sup>+</sup>.

***N*-[2-(4-Ethoxyphenyl)ethyl]-5-methylthiophene-2-carboxamide (11326014):** Yield 65%, M.p. 118-20 °C, <sup>1</sup>H NMR (300 MHz, DMSO-d<sub>6</sub>): 7.83 (br s, 1H), 7.47 (d, 1H, *J* = 3.7 Hz), 7.15 (d, 2H, *J* = 8.7 Hz), 6.88 (d, 1H, *J* = 3.7 Hz), 6.84 (d, 2H, *J* = 8.7 Hz), 4.51 (q, 2H, *J* = 7.4 Hz), 3.43 (t, 2H, *J* = 6.4 Hz), 2.74 (t, 2H, *J* = 6.6 Hz), 2.44 (s, 3H), 1.44 (t, 3H, *J* = 7.4 Hz); LCMS (ESI): *m/z* 290.4 (M+H)<sup>+</sup>.

***N*-(2,2-Diphenylethyl)-5-methylthiophene-2-carboxamide (11326015):** Yield 54%, M.p. 144-46 °C, <sup>1</sup>H NMR (300 MHz, DMSO-d<sub>6</sub>): 7.45 (d, 1H, *J* = 3.7 Hz), 7.28 (m, 4H), 7.23 (m, 6H), 6.98 (br

s, 1H), 6.83 (d, 1H,  $J = 3.7$  Hz), 4.79 (t, 1H,  $J = 7.1$  Hz), 4.05 (d, 2H,  $J = 7.1$  Hz), 2.41 (s, 3H); LCMS (ESI):  $m/z$  322.4 (M+H)<sup>+</sup>.

**1-(Diphenylmethyl)-4-[(5-methyl-2-thienyl)carbonyl]piperazine (11326016):** Yield 57%, M.p. 88-90 °C, <sup>1</sup>H NMR (300 MHz, DMSO-d<sub>6</sub>): 7.51 (d, 1H,  $J = 3.7$  Hz), 7.29 (m, 4H), 7.21 (m, 6H), 6.83 (d, 1H,  $J = 3.7$  Hz), 4.60 (s, 1H), 3.72 (m, 4H), 3.04 (m, 4H), 2.46 (s, 3H); LCMS (ESI):  $m/z$  377.5 (M+H)<sup>+</sup>.

**N-[3-(Aminosulfonyl)phenyl]-5-methylthiophene-2-carboxamide (11326017):** Yield 32%, M.p. 240-42 °C, <sup>1</sup>H NMR (300 MHz, DMSO-d<sub>6</sub>): 9.45 (br s, 1H), 8.02 (m, 1H), 7.74 (br s, 2H), 7.59 (m, 1H), 7.53 (m, 1H), 7.50 (d, 1H,  $J = 3.7$  Hz), 7.18 (m, 1H), 6.71 (d, 1H,  $J = 3.7$  Hz), 2.42 (s, 3H); LCMS (ESI):  $m/z$  297.4 (M+H)<sup>+</sup>.

**N-(2,2-Difluoro-1,3-benzodioxol-5-yl)-5-methylthiophene-2-carboxamide (11326018):** Yield 75%, M.p. 136-38 °C, <sup>1</sup>H NMR (300 MHz, DMSO-d<sub>6</sub>): 10.12 (br s, 1H), 7.76 (s, 1H), 7.43 (d, 1H,  $J = 3.7$  Hz), 7.41 (d, 1H,  $J = 8.6$  Hz), 7.15 (d, 1H,  $J = 8.6$  Hz), 6.79 (d, 1H,  $J = 3.7$  Hz), 2.40 (s, 3H); LCMS (ESI):  $m/z$  298.3 (M+H)<sup>+</sup>.

**1-[(5-Methyl-2-thienyl)carbonyl]-1,2,3,4-tetrahydroquinoline (11326019):** Yield 53%, M.p. 104-06 °C, <sup>1</sup>H NMR (300 MHz, DMSO-d<sub>6</sub>): 7.85 (d, 1H,  $J = 7.1$  Hz), 7.38 (d, 1H,  $J = 3.7$  Hz), 7.24 (t, 1H,  $J = 8.0$  Hz), 7.12 (t, 1H,  $J = 8.0$  Hz), 6.89 (t, 1H,  $J = 7.1$  Hz), 6.81 (d, 1H,  $J = 3.7$  Hz), 3.94 (m, 2H), 3.27 (m, 2H), 2.49 (m, 2H), 2.39 (s, 3H); LCMS (ESI):  $m/z$  258.4 (M+H)<sup>+</sup>.

**N-2-Adamantyl-5-methylthiophene-2-carboxamide (11326020):** Yield 58%, M.p. 152-54 °C, <sup>1</sup>H NMR (300 MHz, DMSO-d<sub>6</sub>): 7.59 (d, 1H,  $J = 3.7$  Hz), 7.01 (t, 1H,  $J = 3.7$  Hz), 6.71 (br s, 1H), 3.98 (m, 1H), 2.48 (s, 3H), 1.93-1.42 (m, 14H); LCMS (ESI):  $m/z$  276.4 (M+H)<sup>+</sup>.

**5-Methyl-N-[4-(trifluoromethyl)phenyl]thiophene-2-carboxamide (11326021):** Yield 63%, M.p. 188-90 °C, <sup>1</sup>H NMR (300 MHz, DMSO-d<sub>6</sub>): 9.16 (br s, 1H), 7.77 (m, 2H), 7.68 (m, 2H), 7.48 (d, 1H,  $J = 3.7$  Hz), 6.92 (d, 1H,  $J = 3.7$  Hz), 2.35 (s, 3H); LCMS (ESI):  $m/z$  286.3 (M+H)<sup>+</sup>.

**N-[2-(2,5-Dimethoxyphenyl)ethyl]-5-methylthiophene-2-carboxamide (11326022):** Yield 60%, M.p. 68-70 °C, <sup>1</sup>H NMR (300 MHz, DMSO-d<sub>6</sub>): 7.48 (d, 1H,  $J = 3.7$  Hz), 6.91 (br s, 1H), 6.86 (d, 1H,  $J = 3.7$  Hz), 6.81 (s, 1H), 6.74 (d, 1H,  $J = 8.6$  Hz), 6.61 (d, 1H,  $J = 8.6$  Hz), 3.75 (s, 3H), 3.67 (s, 3H), 3.50 (t, 2H,  $J = 7.2$  Hz), 2.74 (t, 2H,  $J = 7.2$  Hz), 2.49 (s, 3H); LCMS (ESI):  $m/z$  306.4 (M+H)<sup>+</sup>.

**N-(3-Bromo-4-methoxyphenyl)-5-methylthiophene-2-carboxamide (11326023):** Yield 66%, M.p. 134-6 °C, <sup>1</sup>H NMR (300 MHz, DMSO-d<sub>6</sub>): 8.96 (br s, 1H), 7.78 (s, 1H), 7.49 (d, 1H,  $J = 3.7$  Hz), 7.41 (d, 1H,  $J = 8.7$  Hz), 6.91 (d, 1H,  $J = 8.7$  Hz), 6.78 (d, 1H,  $J = 3.7$  Hz), 3.84 (s, 3H), 2.44 (s, 3H); LCMS (ESI):  $m/z$  327.2 (M+H)<sup>+</sup>.

***N*-1-Adamantyl-5-methylthiophene-2-carboxamide (11326024):** Yield 76%, M.p. 164-6 °C, <sup>1</sup>H NMR (300 MHz, DMSO-d<sub>6</sub>): 7.51 (d, 1H, *J* = 3.7 Hz), 6.94 (d, 1H, *J* = 3.7 Hz), 4.66 (br s, 1H), 2.53 (s, 3H), 2.01 (br s, 3H), 1.67 (m, 12H); LCMS (ESI): *m/z* 276.4 (M+H)<sup>+</sup>.

***N*-Ethyl-5-methyl-*N*-phenylthiophene-2-carboxamide (11326025):** Yield 72%, M.p. 68-70 °C, <sup>1</sup>H NMR (300 MHz, DMSO-d<sub>6</sub>): 7.62 (m, 2H), 7.43 (d, 1H, *J* = 3.7 Hz), 7.29 (m, 3H), 6.81 (d, 1H, *J* = 3.7 Hz), 3.86 (q, 2H, *J* = 7.0 Hz), 2.32 (s, 3H), 1.21 (t, 3H, *J* = 7.0 Hz); LCMS (ESI): *m/z* 246.3 (M+H)<sup>+</sup>.

***N*-(4-Ethylphenyl)-5-methylthiophene-2-carboxamide (11326026):** Yield 57%, M.p. 128-30 °C, <sup>1</sup>H NMR (300 MHz, DMSO-d<sub>6</sub>): 9.26 (br s, 1H), 7.57 (d, 1H, *J* = 3.7 Hz), 7.42 (m, 2H), 7.35 (m, 3H), 6.70 (d, 1H, *J* = 3.7 Hz), 2.60 (q, 2H, *J* = 9.0 Hz), 2.32 (s, 3H), 1.18 (t, 3H, *J* = 9.0 Hz); LCMS (ESI): *m/z* 246.3 (M+H)<sup>+</sup>.

***N*-[(1*Z*)-(Dimethylamino)methylene]-5-methylthiophene-2-carboxamide (11326033):** Yield 67%, M.p. 87-89 °C, <sup>1</sup>H NMR (300 MHz, DMSO-d<sub>6</sub>): 7.63 (br s, 1H), 7.54 (d, 1H, *J* = 3.7 Hz), 6.79 (d, 1H, *J* = 3.7 Hz), 3.14 (s, 6H), 2.41 (s, 3H); LCMS (ESI): *m/z* 197.3 (M+H)<sup>+</sup>.

***N*-[(1*E*)-Anilinomethylene]-5-methylthiophene-2-carboxamide (11326035):** Yield 50%, M.p. 162-4 °C, <sup>1</sup>H NMR (300 MHz, DMSO-d<sub>6</sub>): 10.04 (br s, 1H), 7.68 (d, 1H, *J* = 3.7 Hz), 7.51 (m, 2H), 7.16 (m, 3H), 7.01 (s, 1H), 6.83 (d, 1H, *J* = 3.7 Hz), 2.51 (s, 3H); LCMS (ESI): *m/z* 245.3 (M+H)<sup>+</sup>.

**5-Methyl-*N*-[(1*E*)-[(4-nitrophenyl)amino]methylene]thiophene-2-carboxamide (11326036):** Yield 59%, M.p. 115-7 °C, <sup>1</sup>H NMR (300 MHz, DMSO-d<sub>6</sub>): 10.66 (br s, 1H), 8.50 (d, 2H, *J* = 9.3 Hz), 7.74 (d, 2H, *J* = 9.3 Hz), 7.61 (d, 1H, *J* = 3.7 Hz), 7.13 (s, 1H), 6.84 (d, 1H, *J* = 3.7 Hz), 2.49 (s, 3H); LCMS (ESI): *m/z* 290.3 (M+H)<sup>+</sup>.

***N*-[(1*E*)-[(2,3-Difluorophenyl)amino]methylene]-5-methylthiophene-2-carboxamide (11326037):** Yield 47%, M.p. 158-60 °C, <sup>1</sup>H NMR (300 MHz, DMSO-d<sub>6</sub>): 10.87 (br s, 1H), 7.69 (d, 1H, *J* = 3.7 Hz), 7.11 (m, 1H), 6.76 (d, 1H, *J* = 3.7 Hz), 6.69 (m, 1H), 6.59 (m, 1H), 2.51 (s, 3H); LCMS (ESI): *m/z* 281.3 (M+H)<sup>+</sup>.

**5-Methyl-*N*-[(1*E*)-[4-(trifluoromethoxy)phenyl]amino]methylene]thiophene-2-carboxamide (11326038):** Yield 51%, M.p. 105-7 °C, <sup>1</sup>H NMR (300 MHz, DMSO-d<sub>6</sub>): 10.31 (br s, 1H), 7.76 (d, 2H, *J* = 9.0 Hz), 7.47 (d, 1H, *J* = 3.7 Hz), 7.35 (d, 2H, *J* = 9.0 Hz), 7.13 (s, 1H), 6.83 (d, 1H, *J* = 3.7 Hz), 2.32 (s, 3H); LCMS (ESI): *m/z* 329.3 (M+H)<sup>+</sup>.

**5-Methyl-*N*-[(1*E*)-[methyl(4-methylphenyl)amino]methylene]thiophene-2-carboxamide (11326039):** Yield 56%, M.p. 82-84 °C, <sup>1</sup>H NMR (300 MHz, DMSO-d<sub>6</sub>): 7.78 (s, 1H), 7.53 (d, 1H, *J* = 3.7 Hz), 7.39 (d, 2H, *J* = 9.0 Hz), 7.31 (d, 2H, *J* = 9.0 Hz), 6.78 (d, 1H, *J* = 3.7 Hz), 3.34 (s, 3H), 2.53 (s, 3H), 2.29 (s, 3H); LCMS (ESI): *m/z* 273.4 (M+H)<sup>+</sup>.

***N*-((1*E*)-{[2-(4-Ethoxyphenyl)ethyl]amino}methylene)-5-methylthiophene-2-carboxamide**

**(11326040):** Yield 48%, M.p. 120-2 °C, <sup>1</sup>H NMR (300 MHz, DMSO-d<sub>6</sub>): 8.56 (br s, 1H), 7.64 (s, 1H), 7.39 (d, 1H, *J* = 3.7 Hz), 7.12 (d, 2H, *J* = 8.7 Hz), 6.97 (d, 2H, *J* = 8.7 Hz), 6.79 (d, 1H, *J* = 3.7 Hz), 4.08 (q, 2H, *J* = 6.9 Hz), 3.67 (t, 2H, *J* = 7.1 Hz), 2.78 (t, 2H, *J* = 7.1 Hz), 2.40 (s, 3H), 1.38 (t, 3H, *J* = 6.9 Hz); LCMS (ESI): *m/z* 317.4 (M+H)<sup>+</sup>.

***N*-[(1*E*)-(1-Adamantylamino)methylene]-5-methylthiophene-2-carboxamide (11326041):** Yield 51%, M.p. 170-2 °C, <sup>1</sup>H NMR (300 MHz, DMSO-d<sub>6</sub>): 7.71 (s, 1H), 7.45 (d, 1H, *J* = 3.7 Hz), 7.06 (br s, 1H), 6.74 (d, 1H, *J* = 3.7 Hz), 2.42 (s, 3H), 2.18 (br s, 3H), 1.91 (br s, 3H), 1.69 (br s, 3H); LCMS (ESI): *m/z* 303.4 (M+H)<sup>+</sup>.

***N*-(2,3-Difluorophenyl)-5-methyl-4-nitrothiophene-2-carboxamide (11326042):** Yield 68%, M.p. 150-2 °C, <sup>1</sup>H NMR (300 MHz, DMSO-d<sub>6</sub>): 9.73 (br s, 1H), 8.12 (s, 1H), 7.57 (m, 1H), 6.58 (m, 2H), 2.73 (s, 3H); LCMS (ESI): *m/z* 299.3 (M+H)<sup>+</sup>.

**5-Methyl-4-nitro-*N*-(4-nitrophenyl)thiophene-2-carboxamide (11326043):** Yield 61%, M.p. 273-5 °C, <sup>1</sup>H NMR (300 MHz, DMSO-d<sub>6</sub>): 9.12 (br s, 1H), 8.23 (d, 2H, *J* = 10.4 Hz), 8.11 (s, 1H), 7.75 (d, 2H, *J* = 10.4 Hz), 2.73 (s, 3H); LCMS (ESI): *m/z* 308.3 (M+H)<sup>+</sup>.

**5-Methyl-4-nitro-*N*-[4-(trifluoromethyl)phenyl]thiophene-2-carboxamide (11326044):** Yield 64%, M.p. 260-2 °C, <sup>1</sup>H NMR (300 MHz, DMSO-d<sub>6</sub>): 9.49 (br s, 1H), 8.12 (s, 1H), 7.76 (d, 2H, *J* = 8.4 Hz), 2.69 (s, 3H); LCMS (ESI): *m/z* 331.3 (M+H)<sup>+</sup>.

***N*,5-Dimethyl-*N*-(4-methylphenyl)-4-nitrothiophene-2-carboxamide (11326045):** Yield 73%, M.p. 140-2 °C, <sup>1</sup>H NMR (300 MHz, DMSO-d<sub>6</sub>): 8.05 (s, 1H), 7.19 (m, 4H), 3.68 (s, 3H), 2.74 (s, 3H), 2.35 (s, 3H); LCMS (ESI): *m/z* 291.3 (M+H)<sup>+</sup>.

***N*-[2-(4-Methoxyphenyl)ethyl]-5-methyl-4-nitrothiophene-2-carboxamide (11326046):** Yield 52%, M.p. 148-50 °C, <sup>1</sup>H NMR (300 MHz, DMSO-d<sub>6</sub>): 8.12 (s, 1H), 7.16 (d, 2H, *J* = 8.6 Hz), 6.94 (br s, 1H), 6.87 (d, 2H, *J* = 8.6 Hz), 4.02 (q, 2H, *J* = 6.9 Hz), 3.43 (t, 2H, *J* = 7.1 Hz), 2.74 (t, 2H, *J* = 7.1 Hz), 2.63 (s, 3H), 1.41 (t, 3H, *J* = 6.9 Hz); LCMS (ESI): *m/z* 321.4 (M+H)<sup>+</sup>.

***N*-1-Adamantyl-5-methyl-4-nitrothiophene-2-carboxamide (11326047):** Yield 49%, M.p. 190-2 °C, <sup>1</sup>H NMR (300 MHz, DMSO-d<sub>6</sub>): 8.23 (s, 1H), 4.66 (br s, 1H), 2.69 (s, 3H), 2.01 (br s, 3H), 1.67 (m, 12H); LCMS (ESI): *m/z* 321.4 (M+H)<sup>+</sup>.

***N*-2-Adamantyl-5-methyl-4-nitrothiophene-2-carboxamide (11326048):** Yield 52%, M.p. 178-80 °C, <sup>1</sup>H NMR (300 MHz, DMSO-d<sub>6</sub>): 8.21 (s, 1H), 6.70 (br s, 1H), 3.98 (m, 1H), 2.74 (s, 3H), 1.93-1.42 (m, 14H); LCMS (ESI): *m/z* 321.4 (M+H)<sup>+</sup>.

***N*-[(1*E*)-(2-Adamantylamino)methylene]-5-methyl-4-nitrothiophene-2-carboxamide**

**(11326049):** Yield 16%, M.p. 134-7 °C, <sup>1</sup>H NMR (300 MHz, DMSO-d<sub>6</sub>): 8.15 (br s, 1H), 8.05 (s, 1H), 7.51 (s, 1H), 2.94 (m, 1H), 2.70 (s, 3H), 1.78-1.17 (m, 14H); LCMS (ESI): *m/z* 348.5 (M+H)<sup>+</sup>.

***N*-(4-Fluorophenyl)-5-methyl-4-nitrothiophene-2-carboxamide (11326050):** Yield 59%, M.p. 208-10 °C, <sup>1</sup>H NMR (300 MHz, DMSO-d<sub>6</sub>): 9.23 (br s, 1H), 8.12 (s, 1H), 7.64 (m, 2H), 6.97 (m, 2H), 2.74 (s, 3H); LCMS (ESI): *m/z* 281.3 (M+H)<sup>+</sup>.

***N*-(1*E*)-[(4-Fluorophenyl)amino]methylene}-5-methylthiophene-2-carboxamide (11326051):** Yield 53%, M.p. 162-4 °C, <sup>1</sup>H NMR (300 MHz, DMSO-d<sub>6</sub>): 10.51 (br s, 1H), 7.64 (d, 1H, *J* = 3.6 Hz), 7.32 (m, 2H), 7.16 (s, 1H), 6.93 (m, 2H), 6.83 (d, 1H, *J* = 3.6 Hz), 2.42 (s, 3H); LCMS (ESI): *m/z* 263.3 (M+H)<sup>+</sup>.

***N*-(1*E*)-[(3,4-dimethoxyphenyl)amino]methylene}-5-methylthiophene-2-carboxamide (11326052):** Yield 49%, M.p. 162-4 °C, <sup>1</sup>H NMR (300 MHz, DMSO-d<sub>6</sub>): 11.28 (br s, 1H), 7.60 (d, 1H, *J* = 3.5 Hz), 7.11 (s, 1H), 7.02 (m, 2H), 6.89 (d, 1H, *J* = 3.5 Hz), 6.68 (s, 1H), 4.03 (s, 3H), 3.87 (s, 3H), 2.44 (s, 3H); LCMS (ESI): *m/z* 305.4 (M+H)<sup>+</sup>.

***N*-(1*Z*)-3,4-dihydroisoquinolin-2(1*H*)-ylmethylene]-5-methylthiophene-2-carboxamide (11326053):** Yield 54%, M.p. 125-7 °C, <sup>1</sup>H NMR (300 MHz, DMSO-d<sub>6</sub>): 7.83 (s, 1H), 7.54 (d, 1H, *J* = 3.5 Hz), 7.28 (m, 2H), 6.98 (m, 2H), 6.86 (d, 1H, *J* = 3.5 Hz), 4.34 (q, 2H, *J* = 15.0 Hz), 3.53 (m, 2H), 3.16 (m, 2H), 2.48 (s, 3H); LCMS (ESI): *m/z* 285.4 (M+H)<sup>+</sup>.

***N*-(3,4-Dimethoxyphenyl)-5-methyl-4-nitrothiophene-2-carboxamide (11326054):** Yield 65%, M.p. 200-2 °C, <sup>1</sup>H NMR (300 MHz, DMSO-d<sub>6</sub>): 10.32 (br s, 1H), 8.12 (s, 1H), 7.47 (s, 1H), 7.12 (d, 1H, *J* = 8.5 Hz), 6.83 (d, 1H, *J* = 8.5 Hz), 4.04 (s, 3H), 3.90 (s, 3H), 2.72 (s, 3H); LCMS (ESI): *m/z* 322.3 (M+H)<sup>+</sup>.

**1-[(5-Methyl-4-nitro-2-thienyl)carbonyl]-1,2,3,4-tetrahydroquinoline (11326055):** Yield 61%, M.p. 85-7 °C, <sup>1</sup>H NMR (300 MHz, DMSO-d<sub>6</sub>): 7.96 (s, 1H), 7.61 (m, 1H), 7.14 (m, 3H), 4.73 (q, 2H, *J* = 15.0 Hz), 3.87 (m, 2H), 3.05 (m, 2H), 2.69 (s, 3H); LCMS (ESI): *m/z* 303.4 (M+H)<sup>+</sup>.

**5-Methyl-*N*-(4-methylphenyl)thiophene-2-carboxamide (11326097):** Yield 51%, M.p. 156-8 °C, <sup>1</sup>H NMR (300 MHz, DMSO-d<sub>6</sub>): 9.23 (br s, 1H), 7.48 (d, 1H, *J* = 3.5 Hz), 7.40 (d, 2H, *J* = 8.0 Hz), 7.10 (d, 2H, *J* = 8.0 Hz), 6.81 (d, 1H, *J* = 3.5 Hz), 2.46 (s, 3H), 2.28 (s, 3H); LCMS (ESI): *m/z* 232.3 (M+H)<sup>+</sup>.

***N*-(4-Fluorophenyl)-2-furamide (11326098):** Yield 61%, M.p. 102-4 °C, <sup>1</sup>H NMR (300 MHz, DMSO-d<sub>6</sub>): δ 9.01 (br s, 1H), 7.63 (m, 2H), 7.41 (q, 1H, *J* = 0.8 Hz), 7.16 (d, 1H, *J* = 3.3 Hz), 6.97 (m, 2H), 6.43 (d, 1H, *J* = 3.3 Hz); LCMS (ESI): *m/z* 206.2 (M+H)<sup>+</sup>.

***N*-(3-Fluorophenyl)-5-methylthiophene-2-carboxamide (11326099):** Yield 57%, M.p. 173-6 °C, <sup>1</sup>H NMR (300 MHz, DMSO-d<sub>6</sub>): δ 9.38 (br s, 1H), 7.68 (m, 1H), 7.43 (d, 1H, *J* = 3.5 Hz), 7.37 (m, 1H), 6.83 (m, 2H), 6.78 (d, 1H, *J* = 3.5 Hz), 2.43 (s, 3H); LCMS (ESI): *m/z* 236.3 (M+H)<sup>+</sup>.

***N*-(3,5-Difluorophenyl)-5-methylthiophene-2-carboxamide (11326100):** Yield 65%, M.p. 151-3 °C, <sup>1</sup>H NMR (300 MHz, DMSO-d<sub>6</sub>): δ 9.82 (br s, 1H), 7.54 (m, 2H), 7.44 (d, 1H, *J* = 3.5 Hz), 6.81 (d, 1H, *J* = 3.5 Hz), 6.56 (m, 1H), 2.44 (s, 3H); LCMS (ESI): *m/z* 254.3 (M+H)<sup>+</sup>.

***N*-(3,4-Difluorophenyl)-5-methylthiophene-2-carboxamide (11326101):** Yield 68%, M.p. 128-30 °C, <sup>1</sup>H NMR (300 MHz, DMSO-d<sub>6</sub>): δ 9.31 (br s, 1H), 7.61 (m, 2H), 7.48 (d, 1H, *J* = 3.5 Hz), 7.42 (m, 2H), 7.18 (m, 2H), 6.79 (d, 1H, *J* = 3.5 Hz), 2.39 (s, 3H); LCMS (ESI): *m/z* 254.3 (M+H)<sup>+</sup>.

***N*-(3-Fluorophenyl)-4,5-dimethylthiophene-2-carboxamide (11326102):** Yield 60%, M.p. 138-40 °C, <sup>1</sup>H NMR (300 MHz, DMSO-d<sub>6</sub>): δ 9.17 (br s, 1H), 7.64 (m, 2H), 6.97 (m, 2H), 6.89 (s, 1H), 2.35 (s, 3H), 2.16 (s, 3H); LCMS (ESI): *m/z* 250.3 (M+H)<sup>+</sup>.

***N*-(4-Chlorophenyl)-5-methylthiophene-2-carboxamide (11326103):** Yield 71%, M.p. 142-4 °C, <sup>1</sup>H NMR (300 MHz, DMSO-d<sub>6</sub>): δ 9.21 (br s, 1H), 7.56 (d, 2H, *J* = 9.3 Hz), 7.46 (d, 1H, *J* = 3.5 Hz), 7.31 (d, 2H, *J* = 9.3 Hz), 6.78 (d, 1H, *J* = 3.5 Hz), 2.38 (s, 3H); LCMS (ESI): *m/z* 252.7 (M+H)<sup>+</sup>.

***N*-(4-Chlorobenzyl)-5-methylthiophene-2-carboxamide (11326104):** Yield 74%, M.p. 148-50 °C, <sup>1</sup>H NMR (300 MHz, DMSO-d<sub>6</sub>): δ 7.76 (br s, 1H), 7.41 (d, 1H, *J* = 3.5 Hz), 7.25 (d, 2H, *J* = 9.1 Hz), 7.13 (d, 2H, *J* = 9.1 Hz), 6.92 (d, 1H, *J* = 3.5 Hz), 4.43 (d, 2H, *J* = 0.4 Hz), 2.42 (s, 3H); LCMS (ESI): *m/z* 266.8 (M+H)<sup>+</sup>.

***N*-(4-Chloropyridin-2-yl)-5-methylthiophene-2-carboxamide (11326105):** Yield 69%, M.p. 128-30 °C, <sup>1</sup>H NMR (300 MHz, DMSO-d<sub>6</sub>): δ 9.56 (br s, 1H), 8.37 (d, 1H, *J* = 6.2 Hz), 7.78 (s, 1H), 7.47 (d, 1H, *J* = 3.5 Hz), 7.13 (d, 1H, *J* = 6.2 Hz), 6.79 (d, 1H, *J* = 3.5 Hz), 2.44 (s, 3H); LCMS (ESI): *m/z* 253.7 (M+H)<sup>+</sup>.

***N*-(5-Chloropyridin-2-yl)-5-methylthiophene-2-carboxamide (11326106):** Yield 71%, M.p. 140-2 °C, <sup>1</sup>H NMR (300 MHz, DMSO-d<sub>6</sub>): δ 9.04 (br s, 1H), 8.29 (d, 1H, *J* = 8.9 Hz), 8.16 (s, 1H), 7.93 (d, 1H, *J* = 8.9 Hz), 7.47 (d, 1H, *J* = 3.5 Hz), 6.76 (d, 1H, *J* = 3.5 Hz), 2.43 (s, 3H); LCMS (ESI): *m/z* 253.7 (M+H)<sup>+</sup>.

***N*-(3,4-Dimethoxyphenyl)-2-furamide (10326107):** Yield 57%, M.p. 135-7 °C, <sup>1</sup>H NMR (300 MHz, DMSO-d<sub>6</sub>): δ 9.47 (br s, 1H), 7.47 (s, 1H), 7.39 (q, 1H, *J* = 0.8 Hz), 7.16 (d, 1H, *J* = 3.3 Hz), 7.13 (d, 1H, *J* = 8.3 Hz), 6.84 (d, 2H, *J* = 8.3 Hz), 6.42 (d, 1H, *J* = 2.2 Hz), 3.98 (s, 3H), 3.84 (s, 3H); LCMS (ESI): *m/z* 248.3 (M+H)<sup>+</sup>.

***N*-(3,4-Dimethoxyphenyl)-4,5-dimethylthiophene-2-carboxamide (11326108):** Yield 69%, M.p. 158-60 °C, <sup>1</sup>H NMR (300 MHz, DMSO-d<sub>6</sub>): δ 10.02 (br s, 1H), 7.48 (s, 1H), 7.12 (d, 2H, *J* = 8.5 Hz), 6.90 (s, 1H), 6.83 (d, 2H, *J* = 8.5 Hz), 4.08 (s, 3H), 3.97 (s, 3H), 2.35 (s, 3H), 2.17 (s, 3H); LCMS (ESI): *m/z* 292.4 (M+H)<sup>+</sup>.

**5-Methyl-N-{2-[4-(methylthio)phenyl]ethyl}thiophene-2-carboxamide (11326113):** Yield 74%, M.p. 118-20 °C, <sup>1</sup>H NMR (300 MHz, DMSO-d<sub>6</sub>): δ 7.43 (d, 1H, *J* = 3.5 Hz), 7.24 (d, 2H, *J* = 8.5 Hz), 7.03 (d, 2H, *J* = 8.5 Hz), 6.94 (br s, 1H), 6.89 (d, 1H, *J* = 3.5 Hz), 3.46 (t, 2H, *J* = 6.3 Hz), 2.85 (t, 2H, *J* = 6.3 Hz), 2.43 (s, 3H); LCMS (ESI): *m/z* 292.2 (M+H)<sup>+</sup>.

**N-(4-Fluorophenyl)thiophene-2-carboxamide (11326193):** Yield 71%, M.p. 118-20 °C, <sup>1</sup>H NMR (300 MHz, DMSO-d<sub>6</sub>): 9.23 (br s, 1H), 7.83 (d, 1H, *J* = 3.5 Hz), 7.68 (d, 1H, *J* = 3.5 Hz), 7.63 (m, 2H), 7.15 (dd, 1H, *J* = 4.5 Hz, *J* = 0.9 Hz), 6.98 (m, 2H); LCMS (ESI): *m/z* 222.3 (M+H)<sup>+</sup>.

**N-(3,4-Difluorophenyl)thiophene-2-carboxamide (11326194):** Yield 69%, M.p. 119-21 °C, <sup>1</sup>H NMR (300 MHz, DMSO-d<sub>6</sub>): 9.51 (br s, 1H), 7.89 (d, 1H, *J* = 3.5 Hz), 7.70 (d, 1H, *J* = 3.5 Hz), 7.60 (br s, 1H), 7.45 (br s, 1H), 7.21 (br s, 1H), 7.15 (dd, 1H, *J* = 4.5 Hz, *J* = 0.9 Hz); LCMS (ESI): *m/z* 240.2 (M+H)<sup>+</sup>.

**N-(3,4-Difluorophenyl)-3-methylthiophene-2-carboxamide (11326195):** Yield 65%, M.p. 116-8 °C, <sup>1</sup>H NMR (300 MHz, DMSO-d<sub>6</sub>): 9.43 (br s, 1H), 7.58 (br s, 1H), 7.43 (br s, 1H), 7.25 (d, 1H, *J* = 5.1 Hz), 7.18 (br s, 1H), 6.94 (d, 1H, *J* = 5.1 Hz), 2.27 (s, 3H); LCMS (ESI): *m/z* 254.3 (M+H)<sup>+</sup>.

**N-(3,5-Difluorophenyl)thiophene-2-carboxamide (11326196):** Yield 68%, M.p. 103-5 °C, <sup>1</sup>H NMR (300 MHz, DMSO-d<sub>6</sub>): 9.82 (br s, 1H), 7.84 (d, 1H, *J* = 3.5 Hz), 7.72 (d, 1H, *J* = 3.5 Hz), 7.52 (s, 2H), 7.14 (dd, 1H, *J* = 4.5 Hz, *J* = 0.9 Hz), 6.54 (s, 1H); LCMS (ESI): *m/z* 240.2 (M+H)<sup>+</sup>.

**N-(3,5-Difluorophenyl)-3-methylthiophene-2-carboxamide (11326197):** Yield 70%, M.p. 127-9 °C, <sup>1</sup>H NMR (300 MHz, DMSO-d<sub>6</sub>): 9.73 (br s, 1H), 7.53 (m, 2H), 7.26 (d, 1H, *J* = 5.1 Hz), 6.94 (d, 1H, *J* = 5.1 Hz), 6.57 (m, 1H), 7.14 (dd, 1H, *J* = 4.5 Hz, *J* = 0.9 Hz), 6.54 (s, 1H); LCMS (ESI): *m/z* 254.3 (M+H)<sup>+</sup>.

**N-(4-Chlorophenyl)thiophene-2-carboxamide (11326198):** Yield 71%, M.p. 154-6 °C, <sup>1</sup>H NMR (300 MHz, DMSO-d<sub>6</sub>): 9.82 (br s, 1H), 7.80 (d, 1H, *J* = 3.5 Hz), 7.69 (d, 1H, *J* = 3.5 Hz), 7.54 (d, 2H, *J* = 9.4 Hz), 7.35 (d, 2H, *J* = 9.4 Hz), 2.27 (s, 3H); LCMS (ESI): *m/z* 238.7 (M+H)<sup>+</sup>.

**N-(4-Chlorophenyl)-3-methylthiophene-2-carboxamide (11326199):** Yield 64%, M.p. 125-7 °C, <sup>1</sup>H NMR (300 MHz, DMSO-d<sub>6</sub>): 9.11 (br s, 1H), 7.54 (d, 2H, *J* = 9.5 Hz), 7.35 (d, 2H, *J* = 9.5 Hz), 7.26 (d, 1H, *J* = 5.1 Hz), 6.92 (d, 1H, *J* = 5.1 Hz), 2.26 (s, 3H); LCMS (ESI): *m/z* 252.7 (M+H)<sup>+</sup>.

**N-(4-Fluorophenyl)-5-methyl-2-furamide (11326200):** Yield 74%, M.p. 86-8 °C, <sup>1</sup>H NMR (300 MHz, DMSO-d<sub>6</sub>): δ 9.24 (br s, 1H), 7.64 (m, 2H), 7.02 (d, 1H, *J* = 3.4 Hz), 6.95 (m, 2H), 6.15 (d, 1H, *J* = 3.4 Hz), 2.28 (s, 3H); LCMS (ESI): *m/z* 220.2 (M+H)<sup>+</sup>.

**N-(3,4-Difluorophenyl)-5-methyl-2-furamide (11326201):** Yield 56%, M.p. 88-90 °C, <sup>1</sup>H NMR (300 MHz, DMSO-d<sub>6</sub>): δ 9.32 (br s, 1H), 7.63 (br s, 1H), 7.45 (br s, 1H), 7.18 (br s, 1H), 7.01 (d, 1H, *J* = 3.4 Hz), 6.14 (d, 1H, *J* = 3.4 Hz), 2.27 (s, 3H); LCMS (ESI): *m/z* 238.2 (M+H)<sup>+</sup>.



***N*-(3,5-Difluorophenyl)-5-methyl-2-furamide (11326202):** Yield 63%, M.p. 62-4 °C, <sup>1</sup>H NMR (300 MHz, DMSO-d<sub>6</sub>): δ 9.61 (br s, 1H), 7.52 (br s, 2H), 7.01 (d, 1H, *J* = 3.4 Hz), 7.55 (br s, 2H), 6.14 (d, 1H, *J* = 3.4 Hz), 2.28 (s, 3H); LCMS (ESI): *m/z* 238.2 (M+H)<sup>+</sup>.

***N*-(3,4-Difluorophenyl)-4,5-dimethylthiophene-2-carboxamide (11326203):** Yield 62%, M.p. 153-5 °C, <sup>1</sup>H NMR (300 MHz, DMSO-d<sub>6</sub>): δ 9.46 (br s, 1H), 7.57 (br s, 1H), 7.42 (m, 1H), 7.23 (s, 1H), 6.99 (s, 1H), 2.35 (s, 3H), 2.16 (s, 3H); LCMS (ESI): *m/z* 268.3 (M+H)<sup>+</sup>.

***N*-(4-Chlorophenyl)-5-methyl-2-furamide (11326204):** Yield 79%, M.p. 128-30 °C, <sup>1</sup>H NMR (300 MHz, DMSO-d<sub>6</sub>): δ 9.15 (br s, 1H), 7.55 (br s, 2H), 7.32 (br s, 2H), 7.00 (d, 1H, *J* = 3.4 Hz), 6.14 (d, 1H, *J* = 3.4 Hz), 2.29 (s, 3H); LCMS (ESI): *m/z* 236.7 (M+H)<sup>+</sup>.

***N*-(3,4-Dimethoxyphenyl)-5-methyl-2-furamide (11326205):** Yield 74%, M.p. 116-8 °C, <sup>1</sup>H NMR (300 MHz, DMSO-d<sub>6</sub>): δ 9.87 (br s, 1H), 7.47 (s, 1H), 7.12 (d, 1H, *J* = 9.4 Hz), 7.02 (d, 1H, *J* = 3.4 Hz), 6.85 (d, 1H, *J* = 9.4 Hz), 6.13 (d, 1H, *J* = 3.4 Hz), 3.98 (s, 3H), 3.83 (s, 3H), 2.29 (s, 3H); LCMS (ESI): *m/z* 262.3 (M+H)<sup>+</sup>.

***N*-(3,4-Dimethoxyphenyl)thiophene-2-carboxamide (11326206):** Yield 74%, M.p. 175-7 °C, <sup>1</sup>H NMR (300 MHz, DMSO-d<sub>6</sub>): 10.12 (br s, 1H), 7.89 (d, 1H, *J* = 3.5 Hz), 7.12 (d, 1H, *J* = 9.7 Hz), 6.84 (d, 1H, *J* = 9.7 Hz), 3.99 (s, 3H), 3.83 (s, 3H); LCMS (ESI): *m/z* 264.3 (M+H)<sup>+</sup>.

***N*-(3,4-Dimethoxyphenyl)-3-methylthiophene-2-carboxamide (11326207):** Yield 62%, M.p. 138-40 °C, <sup>1</sup>H NMR (300 MHz, DMSO-d<sub>6</sub>): 10.17 (br s, 1H), 7.44 (s, 1H), 7.25 (d, 1H, *J* = 4.7 Hz), 7.11 (d, 1H, *J* = 9.7 Hz), 6.92 (d, 1H, *J* = 4.7 Hz), 6.85 (d, 1H, *J* = 9.7 Hz), 4.08 (s, 3H), 3.92 (s, 3H), 2.25 (s, 1H); LCMS (ESI): *m/z* 278.3 (M+H)<sup>+</sup>.

***N*-(3,5-Difluorophenyl)-4,5-dimethylthiophene-2-carboxamide (11326208):** Yield 58%, M.p. 138-40 °C, <sup>1</sup>H NMR (300 MHz, DMSO-d<sub>6</sub>): 9.72 (br s, 1H), 7.55 (m, 2H), 6.93 (s, 1H), 6.56 (m, 1H), 2.35 (s, 3H), 2.16 (s, 3H); LCMS (ESI): *m/z* 268.3 (M+H)<sup>+</sup>.

***N*-(4-Chlorophenyl)-4,5-dimethylthiophene-2-carboxamide (11326210):** Yield 63%, M.p. 148-50 °C, <sup>1</sup>H NMR (300 MHz, DMSO-d<sub>6</sub>): δ 9.27 (br s, 1H), 7.53 (d, 2H, *J* = 9.5 Hz), 7.35 (d, 2H, *J* = 9.5 Hz), 6.98 (s, 1H), 2.35 (s, 3H), 2.16 (s, 3H); LCMS (ESI): *m/z* 266.8 (M+H)<sup>+</sup>.

***N*-(4-Fluorophenyl)-4-methylthiophene-2-carboxamide (11326211):** Yield 68%, M.p. 125-7 °C, <sup>1</sup>H NMR (300 MHz, DMSO-d<sub>6</sub>): δ 9.31 (br s, 1H), 7.67 (m, 2H), 7.06 (s, 1H), 6.97 (m, 2H), 6.91 (s, 1H), 2.15 (s, 3H); LCMS (ESI): *m/z* 236.3 (M+H)<sup>+</sup>.

***N*-(3,4-Difluorophenyl)-4-methylthiophene-2-carboxamide (11326212):** Yield 60%, M.p. 150-2 °C, <sup>1</sup>H NMR (300 MHz, DMSO-d<sub>6</sub>): δ 9.46 (br s, 1H), 7.60 (m, 1H), 7.41 (m, 1H), 7.17 (m, 1H), 7.07 (s, 1H), 6.92 (s, 1H), 2.14 (s, 3H); LCMS (ESI): *m/z* 254.3 (M+H)<sup>+</sup>.

***N*-(3,5-Difluorophenyl)-4-methylthiophene-2-carboxamide (11326213):** Yield 60%, M.p. 125-7 °C, <sup>1</sup>H NMR (300 MHz, DMSO-d<sub>6</sub>): δ 9.81 (br s, 1H), 7.51 (m, 2H), 7.06 (s, 1H), 6.92 (s, 1H), 6.56 (m, 1H), 2.16 (s, 3H); LCMS (ESI): *m/z* 254.3 (M+H)<sup>+</sup>.

***N*-(3,4-Dimethoxyphenyl)-4-methylthiophene-2-carboxamide (11326214):** Yield 68%, M.p. 126-8 °C, <sup>1</sup>H NMR (300 MHz, DMSO-d<sub>6</sub>): δ 10.25 (br s, 1H), 7.47 (s, 1H), 7.12 (s, 1H, *J* = 8.6 Hz), 7.06 (s, 1H), 6.93 (s, 1H), 6.81 (s, 1H, *J* = 8.6 Hz), 4.03 (s, 3H), 3.88 (s, 3H), 2.17 (s, 1H); LCMS (ESI): *m/z* 278.3 (M+H)<sup>+</sup>.

***N*-(4-Chlorophenyl)-4-methylthiophene-2-carboxamide (11326215):** Yield 65%, M.p. 185-7 °C, <sup>1</sup>H NMR (300 MHz, DMSO-d<sub>6</sub>): δ 9.22 (br s, 1H), 7.54 (d, 2H, *J* = 9.5 Hz), 7.35 (d, 2H, *J* = 9.5 Hz), 7.06 (s, 1H), 6.93 (s, 1H), 2.16 (s, 3H); LCMS (ESI): *m/z* 252.7 (M+H)<sup>+</sup>.

***N*-(4-Fluorophenyl)-4-methyl-1,3-thiazole-5-carboxamide (11326217):** Yield 49%, M.p. 129-31 °C, <sup>1</sup>H NMR (300 MHz, DMSO-d<sub>6</sub>): δ 9.89 (br s, 1H), 8.77 (s, 1H), 7.71 (m, 2H), 6.96 (m, 2H), 2.41 (s, 3H); LCMS (ESI): *m/z* 237.3 (M+H)<sup>+</sup>.

***N*-(3,5-Difluorophenyl)-4-methyl-1,3-thiazole-5-carboxamide (11326218):** Yield 74%, M.p. 122-24 °C, <sup>1</sup>H NMR (300 MHz, DMSO-d<sub>6</sub>): δ 10.54 (br s, 1H), 8.76 (s, 1H), 7.59 (m, 2H), 6.56 (m, 1H), 2.40 (s, 3H); LCMS (ESI): *m/z* 255.3 (M+H)<sup>+</sup>.

***N*-(4-Chlorophenyl)-4-methyl-1,3-thiazole-5-carboxamide (11326220):** Yield 74%, M.p. 135-37 °C, <sup>1</sup>H NMR (300 MHz, DMSO-d<sub>6</sub>): δ 9.93 (br s, 1H), 8.77 (s, 1H), 7.61 (m, 2H), 7.32 (m, 2H), 2.43 (s, 3H); LCMS (ESI): *m/z* 253.7 (M+H)<sup>+</sup>.

**1-Ethyl-*N*-(4-fluorophenyl)-3-methyl-1*H*-pyrazole-5-carboxamide (11326221):** Yield 70%, M.p. 65-7 °C, <sup>1</sup>H NMR (300 MHz, DMSO-d<sub>6</sub>): δ 10.43 (br s, 1H), 7.81 (m, 2H), 6.99 (m, 2H), 6.62 (s, 1H), 4.42 (q, 2H, *J* = 7.4 Hz), 2.23 (s, 3H), 1.39 (t, 3H, d, *J* = 7.4 Hz); LCMS (ESI): *m/z* 248.3 (M+H)<sup>+</sup>.

***N*-(3,4-Difluorophenyl)-1-ethyl-3-methyl-1*H*-pyrazole-5-carboxamide (11326222):** Yield 70%, M.p. 126-28 °C, <sup>1</sup>H NMR (300 MHz, DMSO-d<sub>6</sub>): δ 10.43 (br s, 1H), 7.76 (br s, 1H), 7.60 (br s, 1H), 7.22 (br s, 1H), 6.61 (s, 1H), 4.44 (q, 2H, *J* = 7.4 Hz), 2.25 (s, 3H), 1.40 (t, 3H, d, *J* = 7.4 Hz); LCMS (ESI): *m/z* 266.3 (M+H)<sup>+</sup>.

***N*-(3,5-Difluorophenyl)-1-ethyl-3-methyl-1*H*-pyrazole-5-carboxamide (11326223):** Yield 65%, M.p. 124-26 °C, <sup>1</sup>H NMR (300 MHz, DMSO-d<sub>6</sub>): δ 10.53 (br s, 1H), 7.68 (m, 2H), 6.61 (s, 1H), 6.56 (br s, 1H), 4.42 (q, 2H, *J* = 7.4 Hz), 2.25 (s, 3H), 1.39 (t, 3H, d, *J* = 7.4 Hz); LCMS (ESI): *m/z* 266.3 (M+H)<sup>+</sup>.

***N*-(3,4-Dimethoxyphenyl)-1-ethyl-3-methyl-1*H*-pyrazole-5-carboxamide (11326224):** Yield 62%, M.p. 118-20 °C, <sup>1</sup>H NMR (300 MHz, DMSO-d<sub>6</sub>): δ 9.87 (br s, 1H), 7.63 (s, 1H), 7.26 (d, 1H,

$J = 9.4$  Hz), 6.89 (d, 1H,  $J = 9.4$  Hz), 6.61 (s, 1H), 4.48 (q, 2H,  $J = 7.4$  Hz), 3.98 (s, 3H), 3.83 (s, 3H), 2.25 (s, 3H), 1.39 (t, 3H, d,  $J = 7.4$  Hz); LCMS (ESI):  $m/z$  290.3 (M+H)<sup>+</sup>.

***N*-(4-Chlorophenyl)-1-ethyl-3-methyl-1*H*-pyrazole-5-carboxamide (11326225)**: Yield 59%, M.p. 92-4 °C, <sup>1</sup>H NMR (300 MHz, DMSO-d<sub>6</sub>): δ 9.95 (br s, 1H), 7.54 (m, 2H), 7.37 (m, 2H), 6.60 (s, 1H), 4.41 (q, 2H,  $J = 7.4$  Hz), 2.23 (s, 3H), 1.40 (t, 3H, d,  $J = 7.4$  Hz); LCMS (ESI):  $m/z$  264.7 (M+H)<sup>+</sup>.

***N*-(4-Fluorophenyl)-3-methylthiophene-2-carboxamide (11326232)**: Yield 64%, M.p. 121-3 °C, <sup>1</sup>H NMR (300 MHz, DMSO-d<sub>6</sub>): δ 9.09 (br s, 1H), 7.63 (s, 1H), 7.25 (d, 1H,  $J = 4.7$  Hz), 6.99 (m, 2H), 6.92 (d, 1H,  $J = 4.7$  Hz), 2.24 (s, 3H); LCMS (ESI):  $m/z$  236.3 (M+H)<sup>+</sup>.

**5-Methyl-*N*-(4-nitrophenyl)thiophene-2-carboxamide 1,1-dioxide (11426026)**: Yield 64%, M.p. 178-80 °C, <sup>1</sup>H NMR (300 MHz, DMSO-d<sub>6</sub>): δ 8.81 (d, 1H,  $J = 3.1$  Hz), 8.61 (br s, 1H), 8.55 (d, 2H,  $J = 10.4$  Hz), 8.07 (d, 2H,  $J = 10.4$  Hz), 7.15 (d, 1H,  $J = 3.1$  Hz), 2.32 (s, 3H); LCMS (ESI):  $m/z$  295.3 (M+H)<sup>+</sup>.

***N*-(4-Fluorophenyl)-4,5-dimethylthiophene-2-carboxamide 1,1-dioxide (11426169)**: Yield 56%, M.p. 190-92 °C, <sup>1</sup>H NMR (300 MHz, DMSO-d<sub>6</sub>): δ 9.01 (s, 1H), 8.74 (br s, 1H), 7.93 (m, 2H), 7.29 (m, 2H), 2.88 (s, 3H), 2.19 (s, 3H); LCMS (ESI):  $m/z$  282.3 (M+H)<sup>+</sup>.

**5-Methyl-*N*-(3,4,5-trifluorophenyl)thiophene-2-carboxamide 1,1-dioxide (11426170)**: Yield 58 %, M.p. 230-34 °C, <sup>1</sup>H NMR (300 MHz, DMSO-d<sub>6</sub>): δ 9.26 (br s, 1H), 8.76 (d, 1H,  $J = 3.1$  Hz), 7.76 (m, 2H), 7.13 (d, 1H,  $J = 3.1$  Hz), 2.42 (s, 3H); LCMS (ESI):  $m/z$  304.3 (M+H)<sup>+</sup>.

**5-Methyl-*N*-[4-(trifluoromethyl)phenyl]thiophene-2-carboxamide 1,1-dioxide (11426171)**: Yield 63 %, M.p. 238-40 °C, <sup>1</sup>H NMR (300 MHz, DMSO-d<sub>6</sub>): δ 8.80 (d, 1H,  $J = 3.1$  Hz), 8.63 (br s, 1H), 8.07 (d, 2H,  $J = 8.5$  Hz), 7.99 (d, 2H,  $J = 8.5$  Hz), 7.14 (d, 1H,  $J = 3.1$  Hz), 2.29 (s, 3H); LCMS (ESI):  $m/z$  318,3 (M+H)<sup>+</sup>.

***N*-(4-Chlorophenyl)-5-methylthiophene-2-carboxamide 1,1-dioxide (11426172)**: Yield 68 %, M.p. 235-37 °C, <sup>1</sup>H NMR (300 MHz, DMSO-d<sub>6</sub>): δ 8.83 (d, 1H,  $J = 3.1$  Hz), 8.70 (br s, 1H), 7.83 (d, 2H,  $J = 9.6$  Hz), 7.64 (d, 2H,  $J = 9.6$  Hz), 7.18 (d, 1H,  $J = 3.1$  Hz), 2.29 (s, 3H); LCMS (ESI):  $m/z$  284.7 (M+H)<sup>+</sup>.

***N*-(3,4-Difluorophenyl)-5-methylthiophene-2-carboxamide 1,1-dioxide (11426173)**: Yield 64 %, M.p. 225-27 °C, <sup>1</sup>H NMR (300 MHz, DMSO-d<sub>6</sub>): δ 8.96 (br s, 1H), 8.80 (d, 1H,  $J = 3.1$  Hz), 7.86 (m, 1H), 7.74 (m, 1H), 7.49 (m, 1H), 7.14 (d, 1H,  $J = 3.1$  Hz), 2.34 (s, 3H); LCMS (ESI):  $m/z$  286.3 (M+H)<sup>+</sup>.

**5-Methylthiophen-2(3*H*)-one 1,1-dioxide (11426174)**: Yield 73%, M.p. 134-36 °C, <sup>1</sup>H NMR (300 MHz, DMSO-d<sub>6</sub>): δ 6.09 (d, 1H,  $J = 1.5$  Hz), 3.42 (t, 1H,  $J = 2.5$  Hz), 1.96 (s, 1H); LCMS

LCMS (ESI):  $m/z$  147.2 (M+H)<sup>+</sup>.

#### SUPPLEMENTARY REFERENCES

Copeland, A.R. (2000). *Enzymes: A Practical Introduction to Structure, Mechanism, and Data Analysis*.

King, J.Y., Ferrara, R., Tabibiazar, R., Spin, J.M., Chen, M.M., Kuchinsky, A., Vailaya, A., Kincaid, R., Tsalenko, A., Deng, D.X., et al. (2005). Pathway analysis of coronary atherosclerosis. *Physiol. Genomics*. *23*, 103-118.

Manganelli, R., Voskuil, M.I., Schoolnik, G.K., and Smith, I. (2001). The *Mycobacterium tuberculosis* ECF sigma factor sigmaE: role in global gene expression and survival in macrophages. *Mol. Microbiol.* *41*, 423-37.

Pesek, J.J., Matyska, M.T., Fischer, S.M., and Sana, T.R. (2008). Analysis of hydrophilic metabolites by high-performance liquid chromatography-mass spectrometry using a silica hydride-based stationary phase. *J. Chromatogr. A*. *1204*, 48-55.

Rao, S.N., Head, M.S., Kulkarni, A., LaLonde, J.M. (2007). Validation studies of the site-directed docking program LibDock. *J. Chem. Inf. Model.* *47*, 2159-2171.

Robert, X., and Gouet, P. (2014) Deciphering key features in protein structures with the new ENDscript server. *Nucleic Acids Res.* *42*, W320-4.

Sambrook, J., and Russel, D.W. (2001). *Molecular Cloning: a laboratory manual*.

Singh, V., Brecik, M., Mukherjee, R., Evans, J.C., Svetlikova, Z., Blasko, J., Surade, S., Blackburn, J., Warner, D.F., Mikusova, K., and Mizrahi, V. (2015). The complex mechanism of antimycobacterial action of 5-Fluorouracil. *Chem. Biol.* *22*, 63-75.

Stierand, K., and Rarey, M. (2010) Drawing the PDB: Protein-Ligand Complexes in Two Dimensions. *ACS Med. Chem. Lett.* *1*, 540-5.

Zalkin, H., and Smith, J.L. (1998). Enzymes utilizing glutamine as an amide donor. *Adv. Enzymol. Relat. Areas Mol. Biol.* 72, 87–144.
